# Supplementary material for: A regulatory circuit of miR-125b/miR-20b and Wnt signalling controls glioblastoma phenotypes through FZD6-modulated pathways
Source: PubMed Central journal article supplement (PMC5059456; doi:10.1038/ncomms12885), 2016-10-04
Supplement: ncomms12885-s1.pdf [file ncomms12885-s1.pdf]

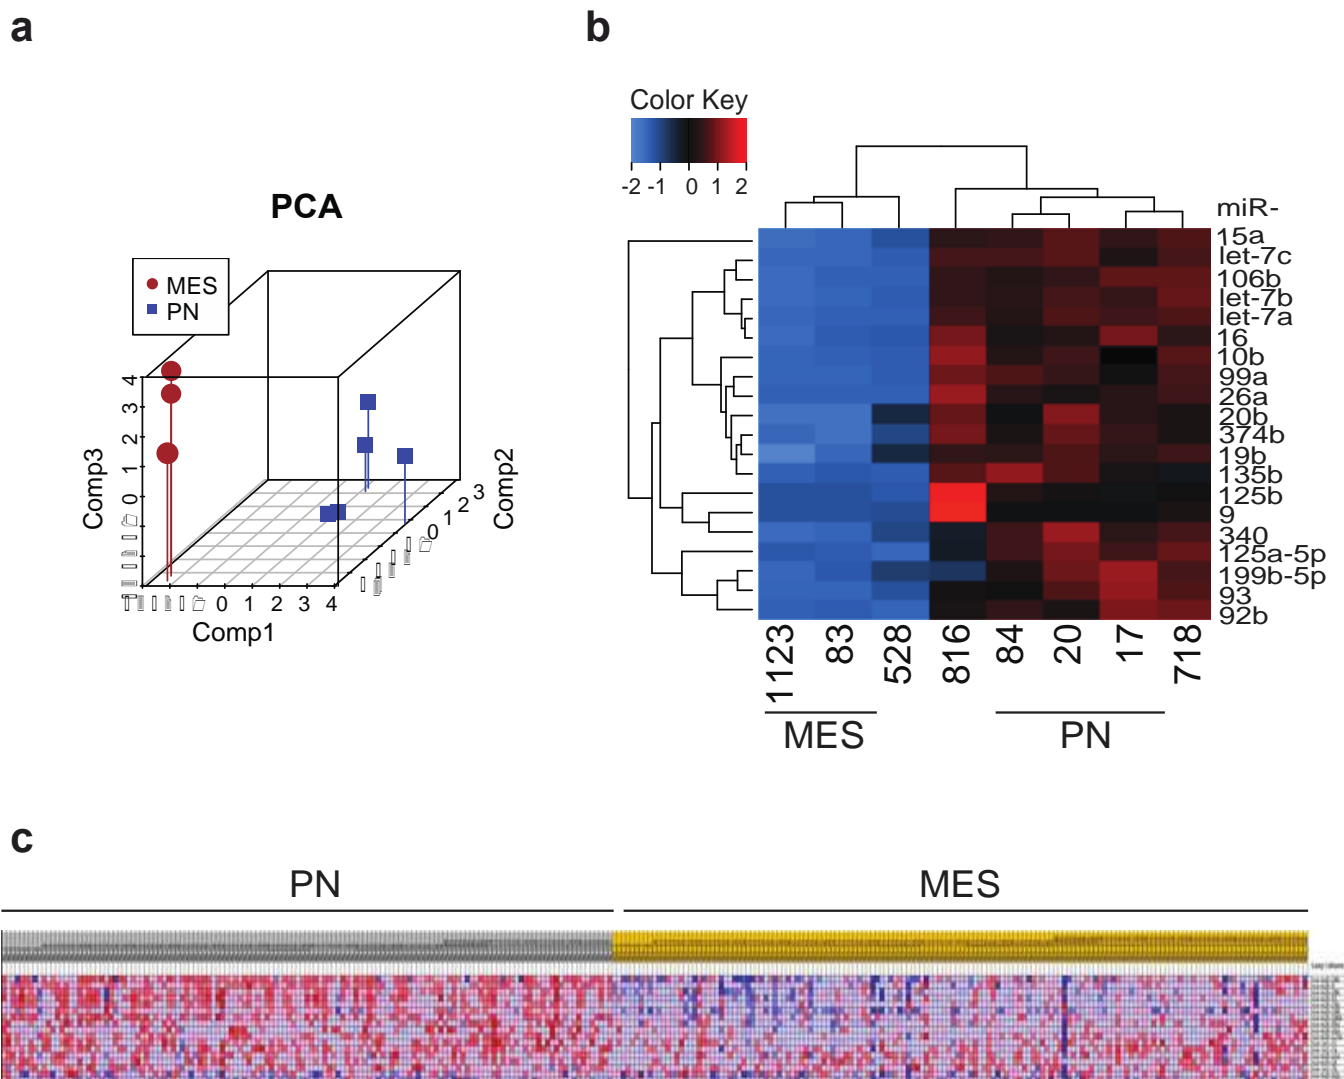

**Supplementary Figure 1 (Related to Figure 1)** (a) Principal component analysis (PCA) using Cluster 3.0 software shows PN miRNA expression profile clusters glioma PN spheres 84, 17, 20, and MES clusters 83, 1123. (b) The top 20 miRNAs that are enriched in PN glioma spheres compared to MES glioma spheres. Heat maps generated using Java Tree view 1.1.6 using Cluster 3.0 software as shown in Figure 1A. (c) Analysis of miRNA expression in GBM of TCGA dataset. 20 miRNAs with top-ratios between expression averages of PN and MES glioma spheres also cluster in PN and MES clinical GBM.

**a**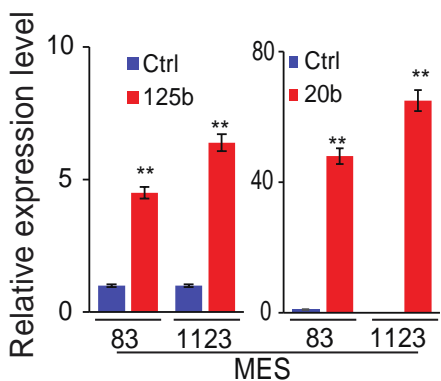**b**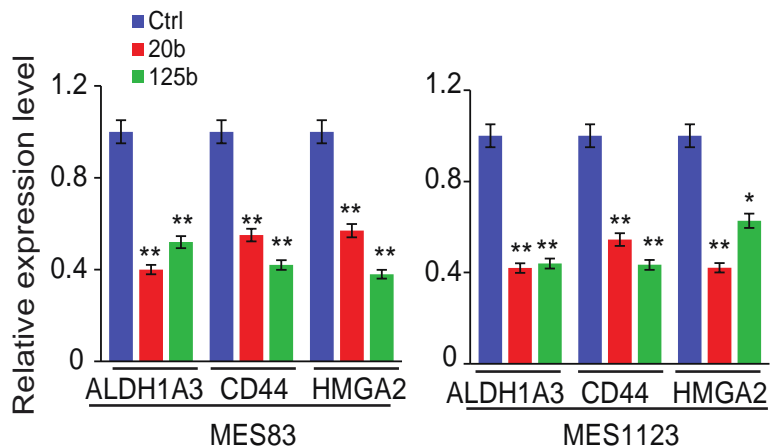**c**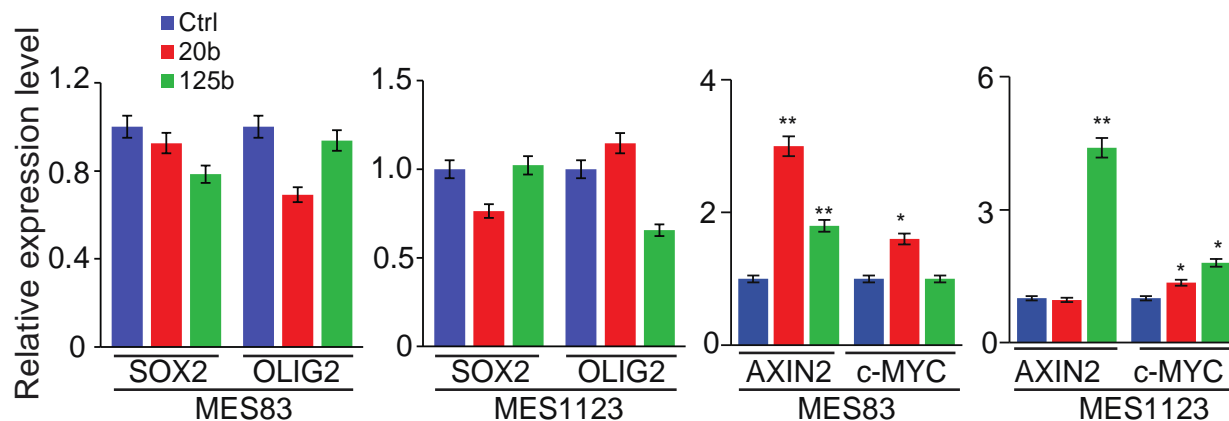**d**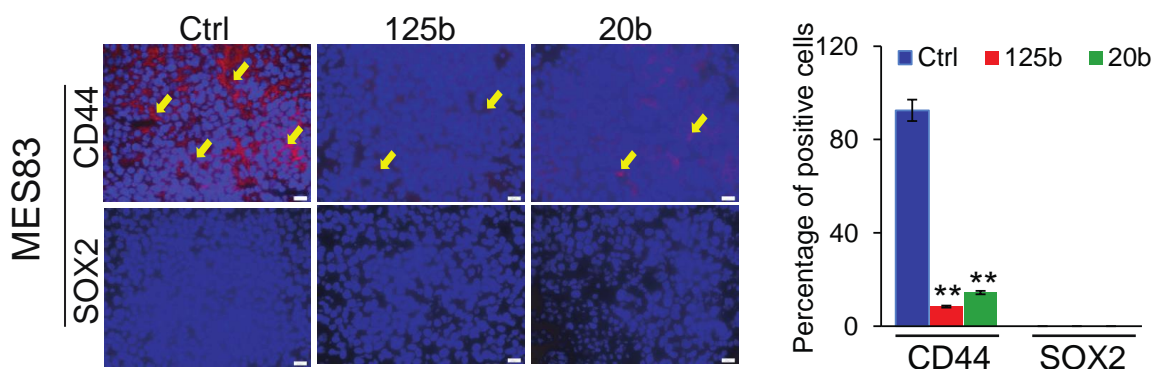**e**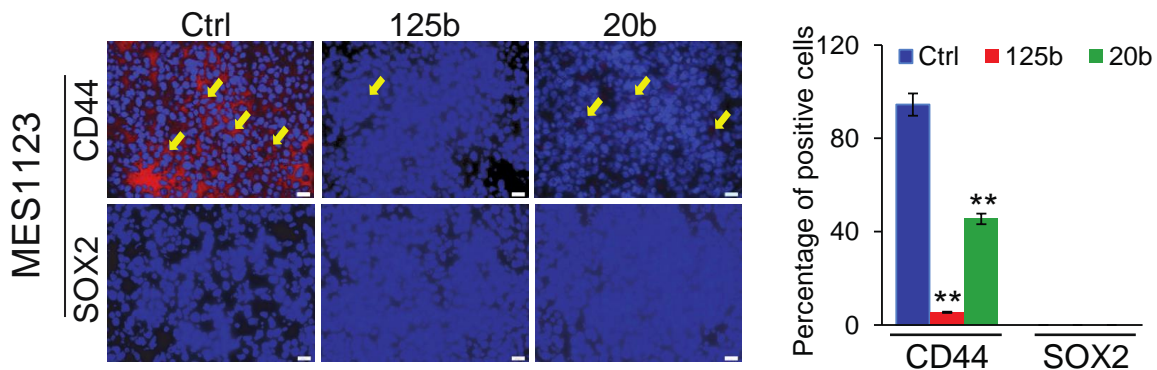

**Supplementary Figure 2 (Related to Figure 2).** Overexpression of miR-125b and miR-20b suppressed MES-associated genes expression and increased Wnt-related genes in glioma spheres. qRT-PCR analyses were performed to determine the expression levels of miR-125b and miR-20b (**a**), MES-associated genes *ALDH1A3*, *CD44*, and *HMGGA2* (**b**), and PN-associated genes *SOX2* and *OLIG2*, as well as Wnt-related genes Axin2 and c-Myc (**c**), in MES 83 and 1123 glioma spheres that separately overexpress miR-125b, miR-20b, or a control miRNA. (**d**) and (**e**), immunofluorescent IHC analyses of protein expression of CD44 and SOX2 in brain tumor xenografts established at 16 days post-implantation by MES 83 (**d**) and 1123 (**e**) spheres that separately overexpress miR-125b, miR-20b, or a control miRNA. Scale bar: 20  $\mu$ m. Yellow arrows indicate positively stained cells. Right bar graphs, quantitation of positively stained cells. Data were collected from 3 separate tumors per group and 5 images per tumor. Error bars (s.d.) represent data of triplicate samples for each set of experiments. \* $p < 0.05$ , \*\* $p < 0.01$ , paired two-way Student t-test. Data are representative from three independent experiments with similar results.

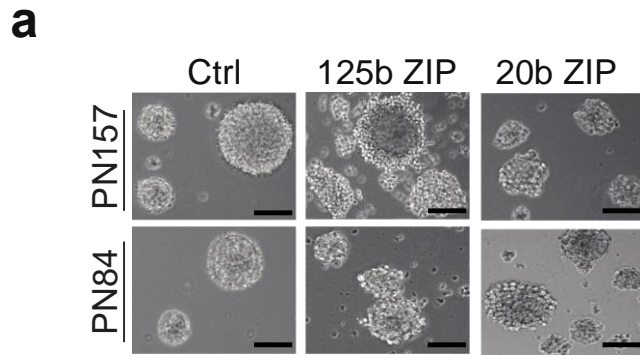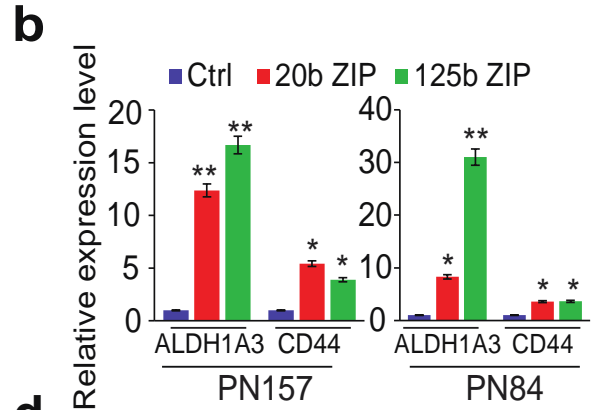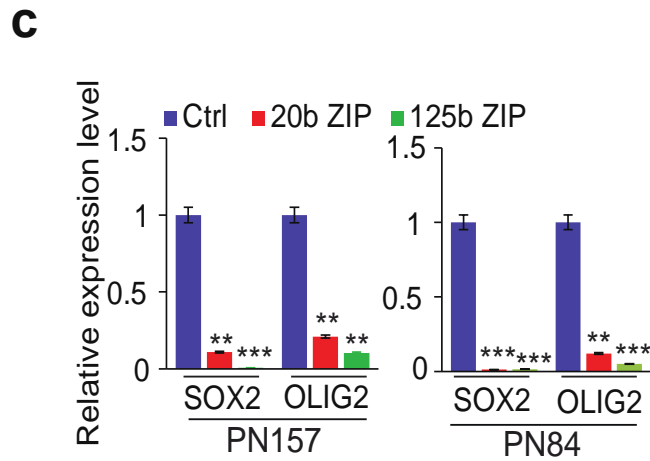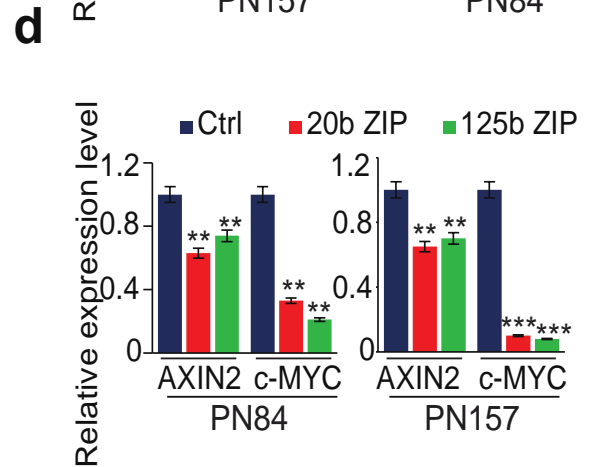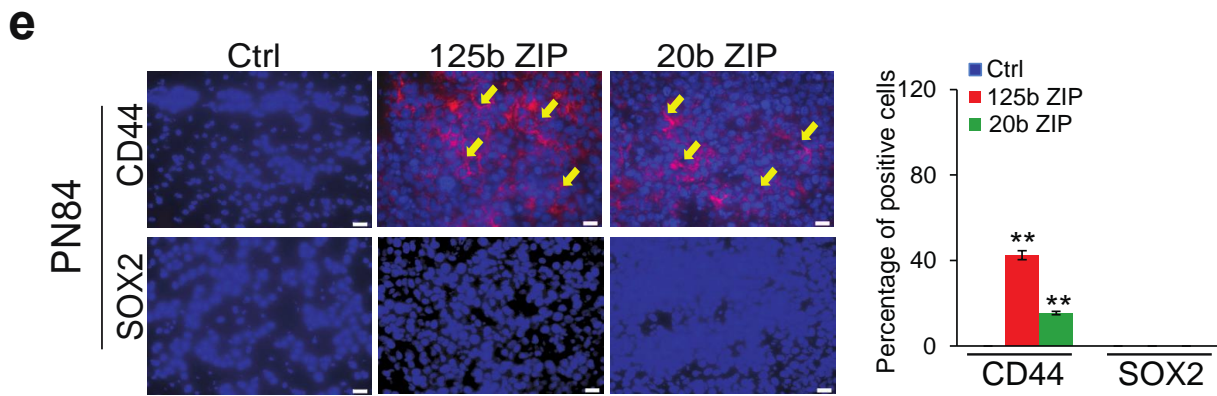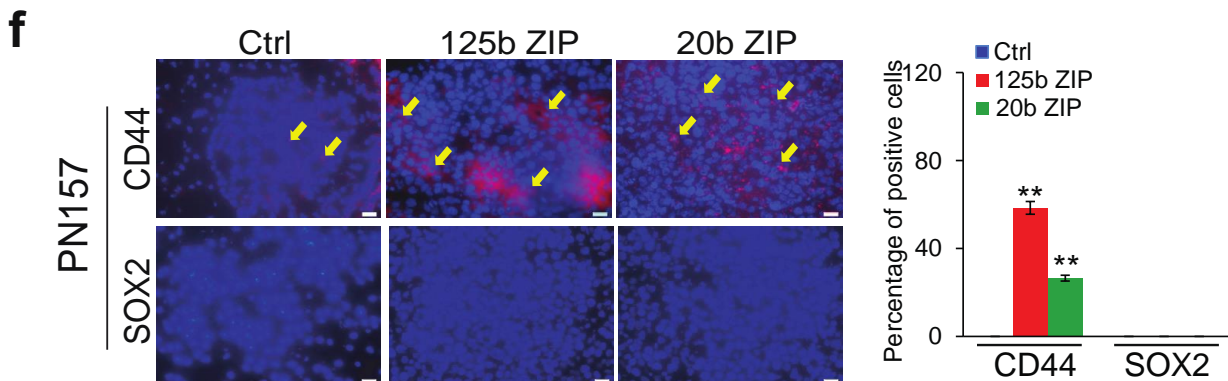

**Supplementary Figure 3 (Related to Figure 2)** Inhibition of miR-125b and miR-20b induced MES-associated gene expression, but suppressed Wnt-related genes in PN glioma spheres. **(a)** Representative images of neurospheres of PN 157 and PN 84 that separately express miR-125 ZIP, miR-20b ZIP, or a control miRZIP. Scale bar: 50  $\mu$ m. **(b)** MES-associated genes *ALDH1A3* and *CD44*, **(c)** PN-associated genes *SOX2* and *OLIG2*, and **(d)** Wnt-related genes *AXIN2* and *c-MYC* were analyzed using qRT-PCR analyses in PN 157 and 84 that express miR-20b ZIP, miR-125 ZIP or a control miRNA ZIP.  $\beta$ -actin was used as an internal control. **(e)**, **(f)**, immunofluorescent IHC analyses of protein expression of CD44 and SOX2 in brain tumor xenografts established by PN 84 **(e)** and 157 **(f)** spheres that separately overexpress miR-125 ZIP, miR-20b ZIP, or a control miRZIP. Both control PN 84 and 157 glioma spheres failed to form sizable brain tumor xenografts on 12 (PN 84) or 15 (PN 157) days post-implantation. Thus it was difficult to detect PN-associated Sox2 protein expression in these brain sections **(e and f)**, lower panels and bar graphs). Scale bar: 20  $\mu$ m. Yellow arrows indicate positively stained cells. Right bar graphs, quantitation of positively stained cells. Data were collected from 3 separate tumors per group and 5 images per tumor. Error bars (s.d.) represent data of triplicate samples for each set of experiments. \* $p < 0.05$ , \*\* $p < 0.01$ , \*\*\* $p < 0.001$ , paired two-way Student t-test. Data are representative from three independent experiments with similar results.

**a**

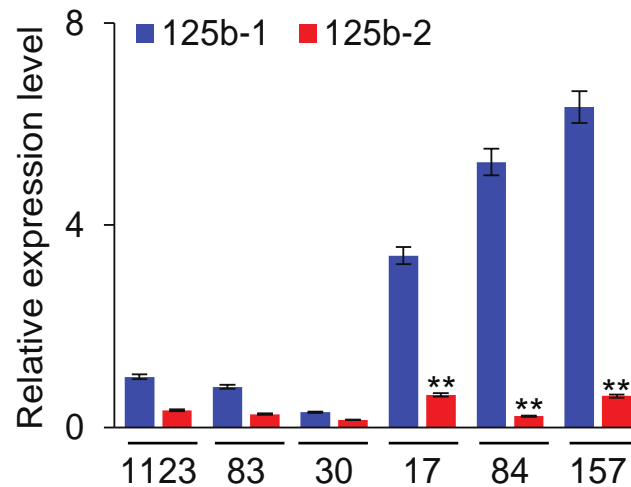

**b**

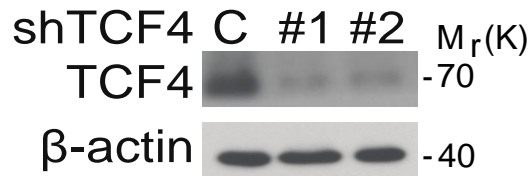

**Supplementary Figure 4 (Related to Figure 3)** (a) The pre-miR-125b-1 on chromosome hsa11 is a major pre-miR that contributes to mature miR-125b expression in glioma spheres. qRT-PCR analyses were performed to determine the expression levels of pre-miR-125b-1 and pre-miR-125b-2 in indicated glioma spheres. (b) IB analysis of TCF4 protein on PN expressing a control shRNA and two TCF4 specific shRNAs. Error bars (s.d.) represent data of triplicate samples for each set of experiments. \*\*p < 0.01, paired two-way Student t-test. Data are representative from two independent experiments with similar results.

**a**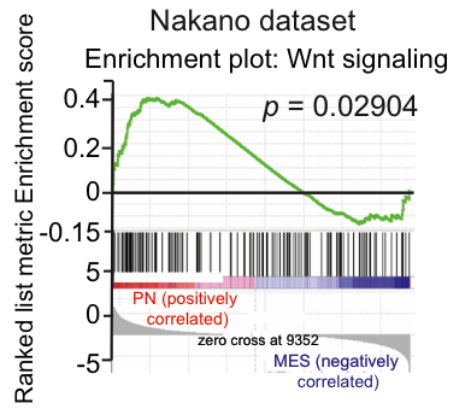**b**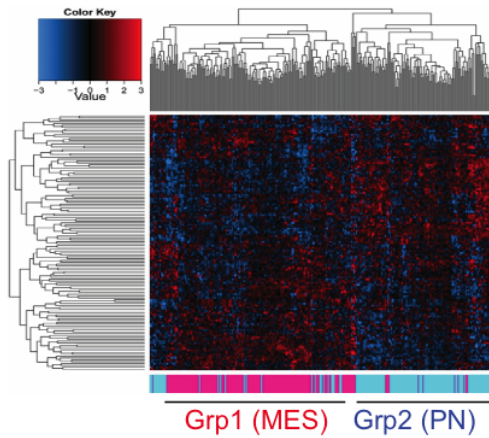**c**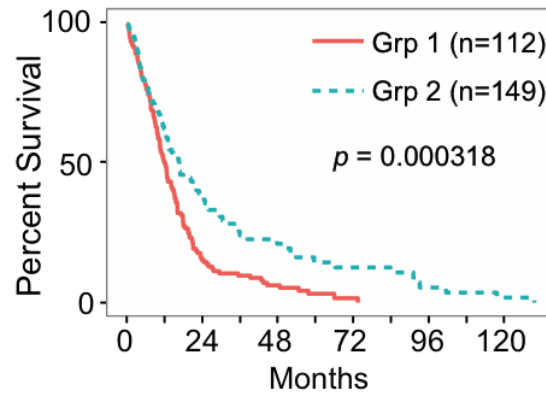**d**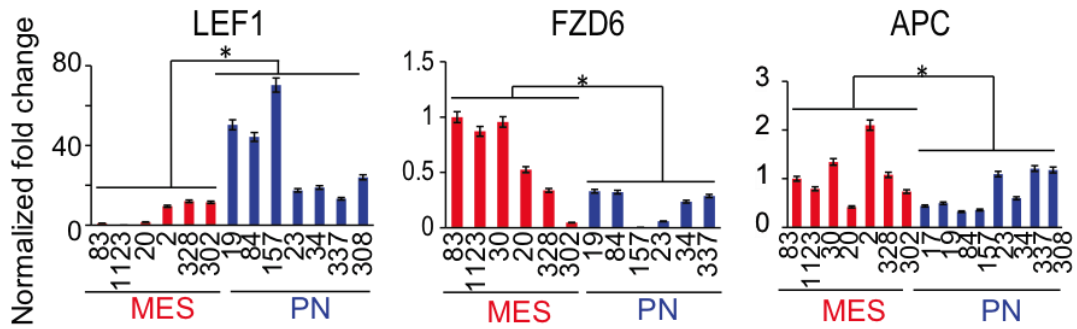**e**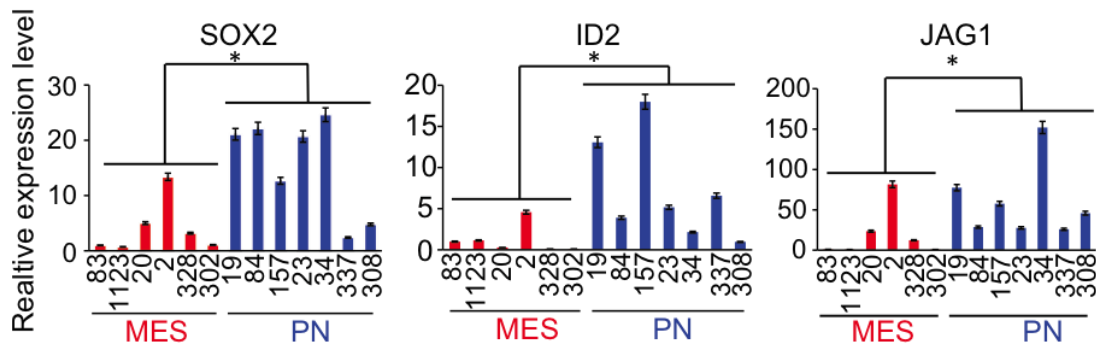

f

|             | PN          |             |              | MES          |              |             | PN           |              |              | MES          |              |
|-------------|-------------|-------------|--------------|--------------|--------------|-------------|--------------|--------------|--------------|--------------|--------------|
|             | 84          | 157         | 17           | 83           | 1123         |             | 84           | 157          | 17           | 83           | 1123         |
| WNT1        | 11.9        | 11.6        | 11.9         | 11.7         | 12.7         | FZD1        | 72.1         | 82.0         | 320.9        | 53.2         | 40.3         |
| WNT2        | 11.7        | 12.0        | 11.5         | 11.7         | 12.9         | FZD2        | 145.8        | 138.2        | 155.1        | 146.5        | 530.6        |
| WNT2B       | 16.3        | 16.8        | 16.0         | 19.8         | 21.9         | <b>FZD3</b> | <b>306.4</b> | <b>348.7</b> | <b>201.3</b> | <b>24.4</b>  | <b>18.9</b>  |
| <b>WNT3</b> | <b>89.5</b> | <b>94.5</b> | <b>152.5</b> | <b>183.7</b> | <b>186.4</b> | FZD4        | 23.5         | 23.2         | 17.3         | 19.6         | 20.0         |
| WNT3A       | 15.3        | 15.5        | 14.7         | 16.5         | 17.5         | <b>FZD5</b> | <b>244.9</b> | <b>149.3</b> | <b>70.5</b>  | <b>36.7</b>  | <b>34.1</b>  |
| WNT4        | 22.2        | 20.5        | 20.2         | 22.4         | 24.6         | <b>FZD6</b> | <b>13.3</b>  | <b>13.1</b>  | <b>62.7</b>  | <b>271.2</b> | <b>410.1</b> |
| WNT5A       | 21.6        | 24.3        | 14.6         | 18.3         | 18.5         | FZD7        | 68.8         | 56.4         | 55.3         | 154.8        | 144.1        |
| WNT5B       | 23.9        | 22.9        | 26.5         | 47.5         | 67.2         | <b>FZD8</b> | <b>179.6</b> | <b>132.5</b> | <b>131.9</b> | <b>456.6</b> | <b>66.3</b>  |
| WNT6        | 19.3        | 20.3        | 19.6         | 21.0         | 25.0         | FZD9        | 17.0         | 16.2         | 15.3         | 16.2         | 17.3         |
| WNT7A       | 25.6        | 25.5        | 25.7         | 22.5         | 27.3         | FZD10       | 15.3         | 15.4         | 14.5         | 14.8         | 16.1         |
| WNT7B       | 53.8        | 32.7        | 44.8         | 18.0         | 20.9         | <b>LRP6</b> | <b>311.6</b> | <b>343.8</b> | <b>294.7</b> | <b>82.6</b>  | <b>87.9</b>  |
| WNT8A       | 12.7        | 13.2        | 12.6         | 12.0         | 13.5         | ROR2        | 15.3         | 16.2         | 15.4         | 35.3         | 19.0         |
| WNT8B       | 9.5         | 11.0        | 9.6          | 9.8          | 10.1         | <b>RYK</b>  | <b>594.6</b> | <b>563.8</b> | <b>581.4</b> | <b>709.4</b> | <b>606.4</b> |
| WNT9A       | 14.7        | 14.1        | 14.7         | 14.9         | 16.0         |             |              |              |              |              |              |
| WNT9B       | 27.6        | 26.0        | 26.6         | 24.9         | 27.2         |             |              |              |              |              |              |
| WNT10A      | 13.7        | 14.1        | 14.3         | 13.5         | 15.8         |             |              |              |              |              |              |
| WNT10B      | 59.1        | 59.7        | 58.0         | 71.1         | 72.0         |             |              |              |              |              |              |
| WNT11       | 12.5        | 11.7        | 12.1         | 14.1         | 14.0         |             |              |              |              |              |              |
| WNT16       | 9.2         | 9.6         | 8.9          | 9.8          | 10.0         |             |              |              |              |              |              |

g

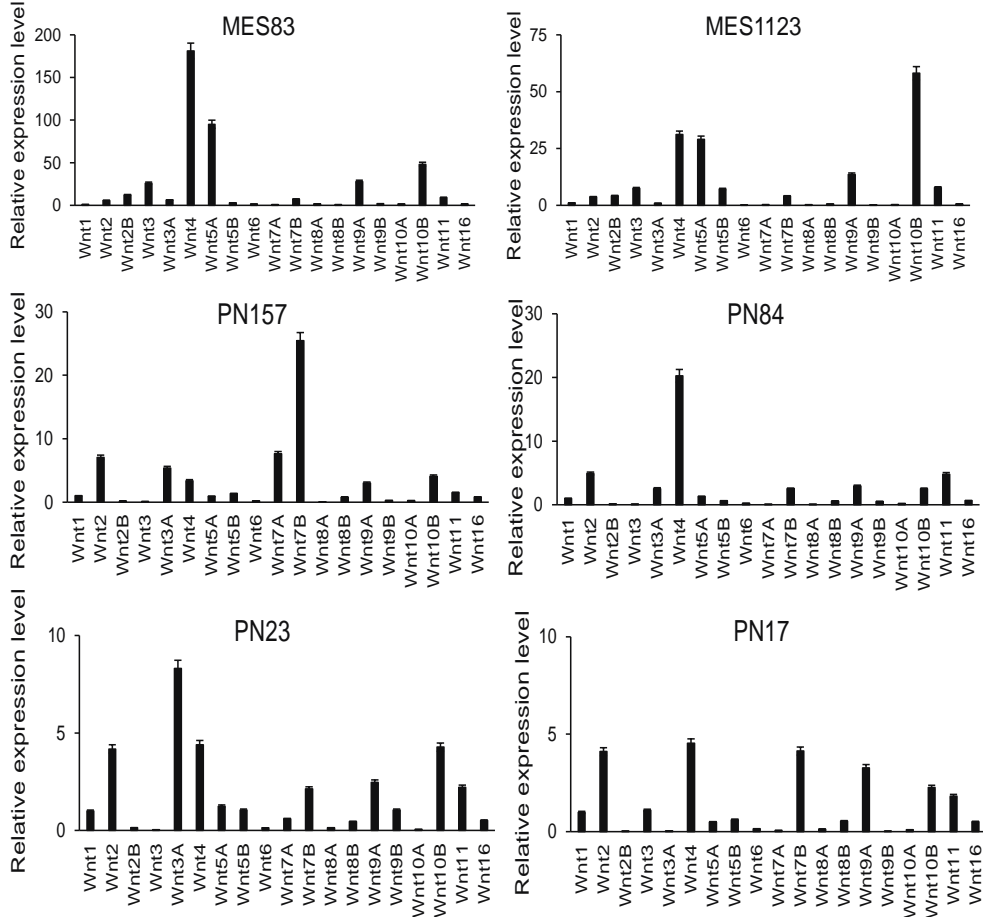

h

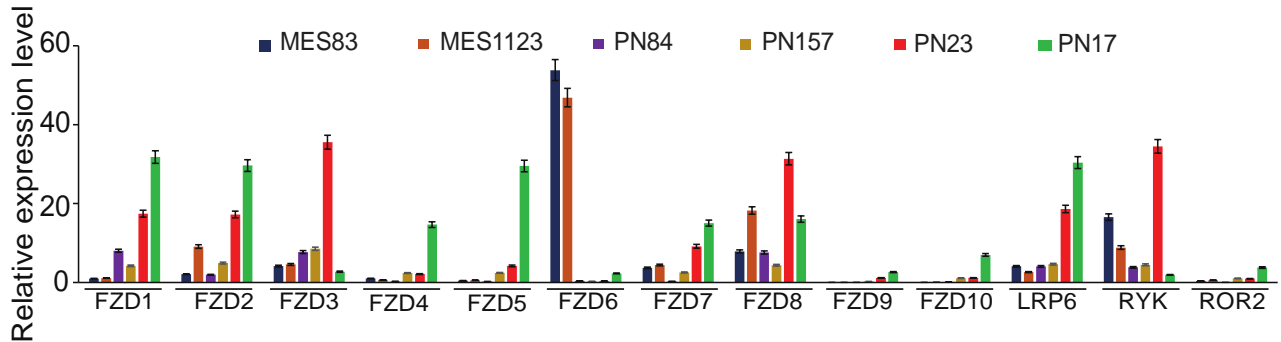



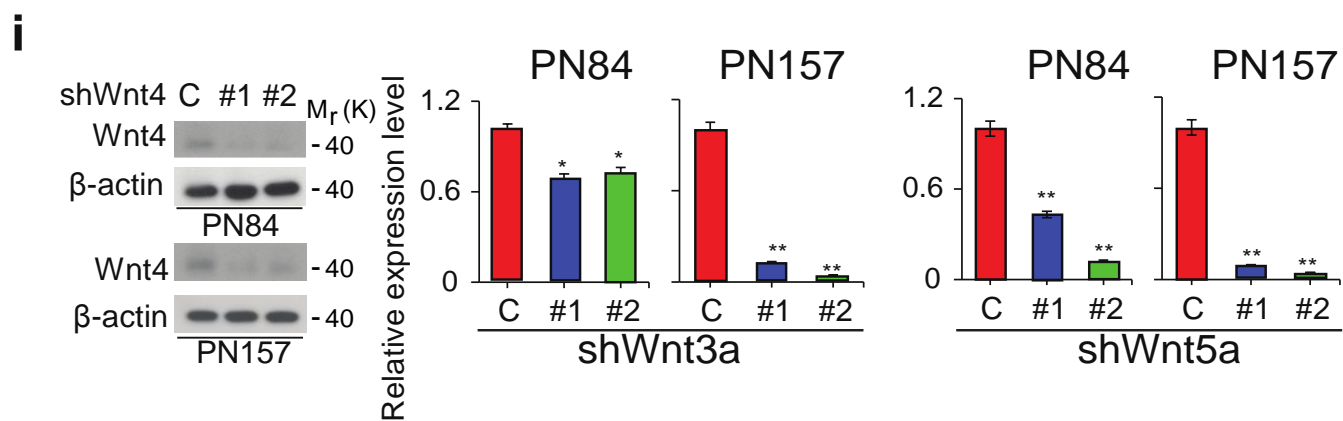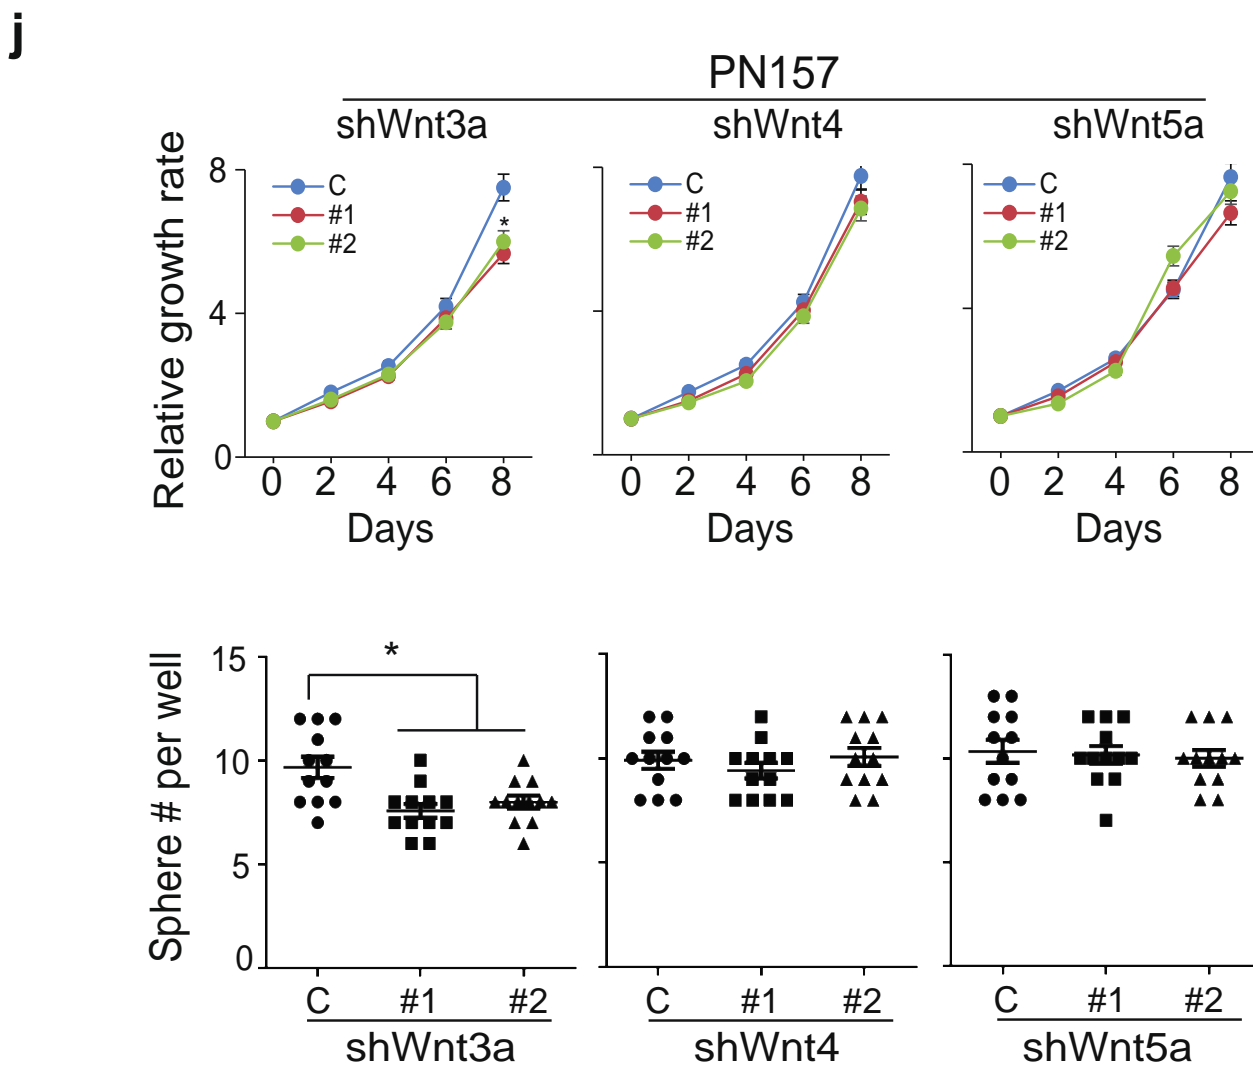

**Supplementary Figure 5 (Related to Figure 4)** Wnt signaling activity is active in PN but not MES glioma spheres. (a) Gene Set Enrichment Analysis (GSEA) of data sets of Nakano (GEO# GSE67089)<sup>1</sup> for enrichment of the canonical Wnt pathway between PN and MES GBM. (b) Analysis of TCGA dataset for enrichment of Wnt signaling pathway (KEGG) clustered group 1 (Grp1, most are MES) and group 2 (Grp2, most are PN) GBM tumors. (c) Kaplan-Meier survival

analysis of TCGA data (Wnt signaling pathway enrichment) of two patient subgroups (Grp1-MES vs Grp2-PN) obtained from (b). (d,e) qRT-PCR analyses were performed to validate expression of LEF1, FZD6 and APC, and canonical Wnt signaling target genes *SOX2*, *ID2* and *JAG1* in indicated PN and MES glioma spheres. (f) cDNA array data of Wnt ligands, FZDs, LRP6, ROR2, and RYK (GEO# GSE67089)<sup>1</sup>. (g,h) qRT-PCR analyses were performed to validate the expression of 19 WNT ligands, 10 FZDs, LRP6, ROR2, and RYK in PN and MES spheres. (i) IB analysis of WNT4 protein on PN 84 and 157 expressing a control shRNA and *WNT4* specific shRNAs. Right panels, due to incapability of detecting WNT3a and WNT5a proteins using IB with commercial available antibodies, qRT-PCR analyses were used to validate mRNA expression of *WNT3a* and *WNT5a* in PN 84 and 157 expressing a control shRNA vector and specific shRNAs targeting *WNT3a* or *WNT5a*, respectively. (j) Cell proliferation (upper panels) and neural sphere formation assays (lower panels) for PN157 expressing a control shRNA or specific shRNAs targeting *WNT3a*, *WNT4* or *WNT5a*, respectively. Error bars (s.d.) represent data of triplicate samples for each set of experiments. \*p <0.05, \*\*p <0.01, \*\*\*p <0.001, paired two-way Student t-test. Data are representative from three independent experiments with similar results.

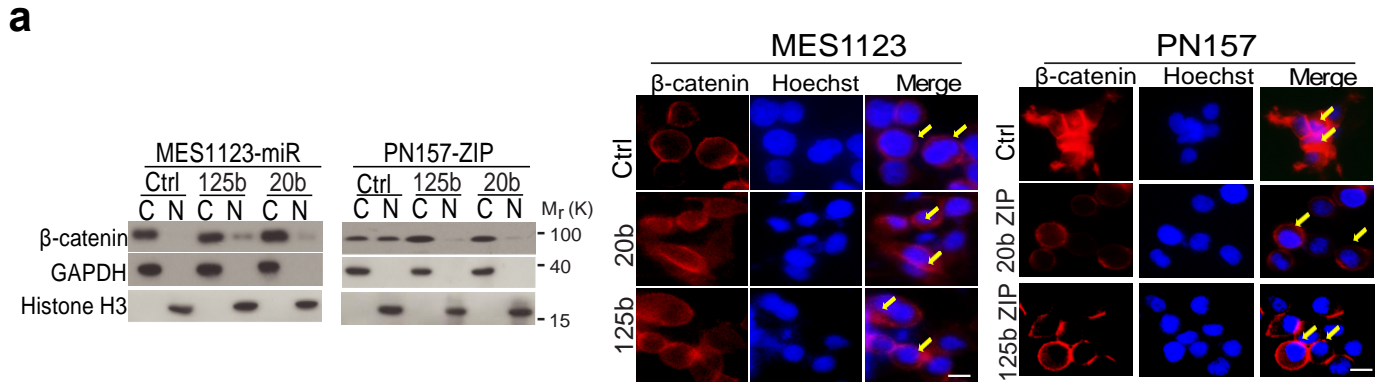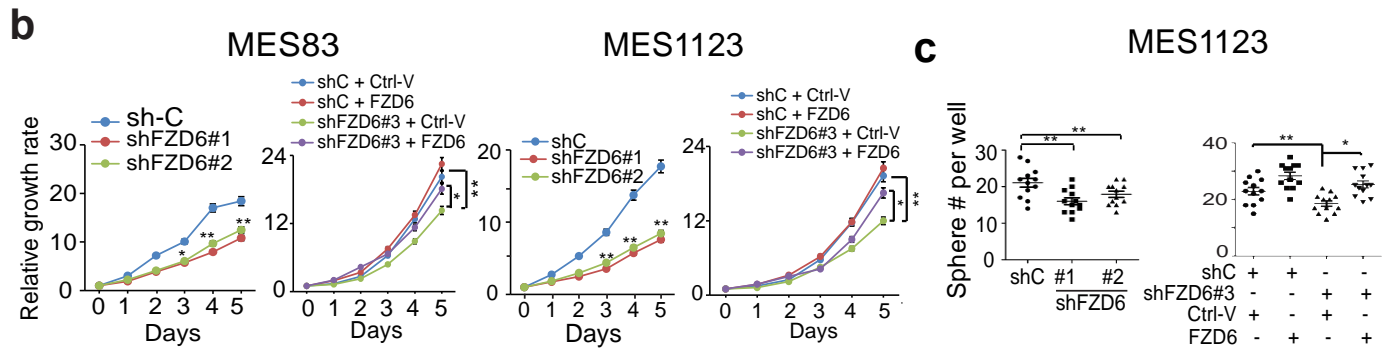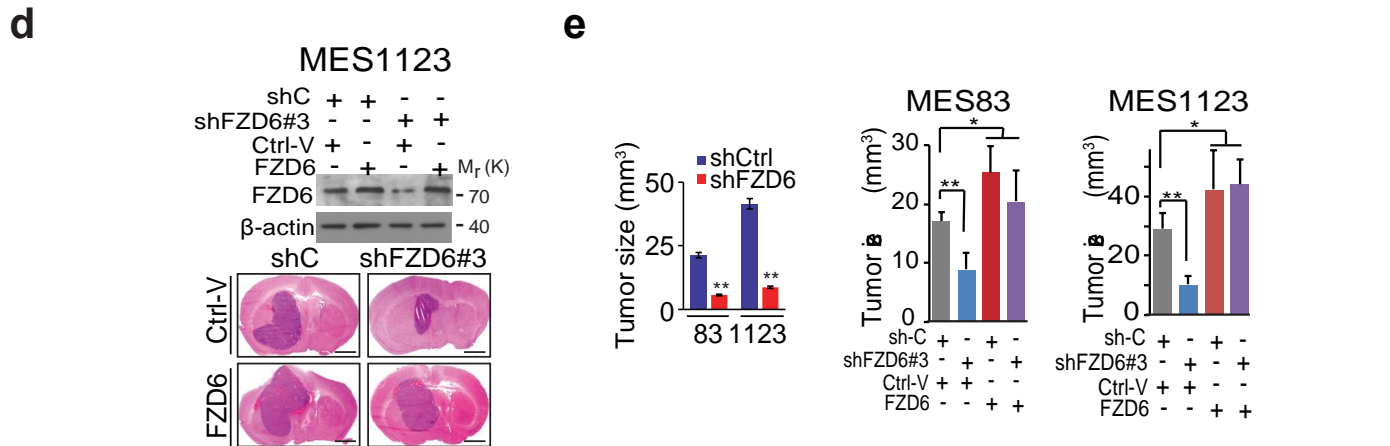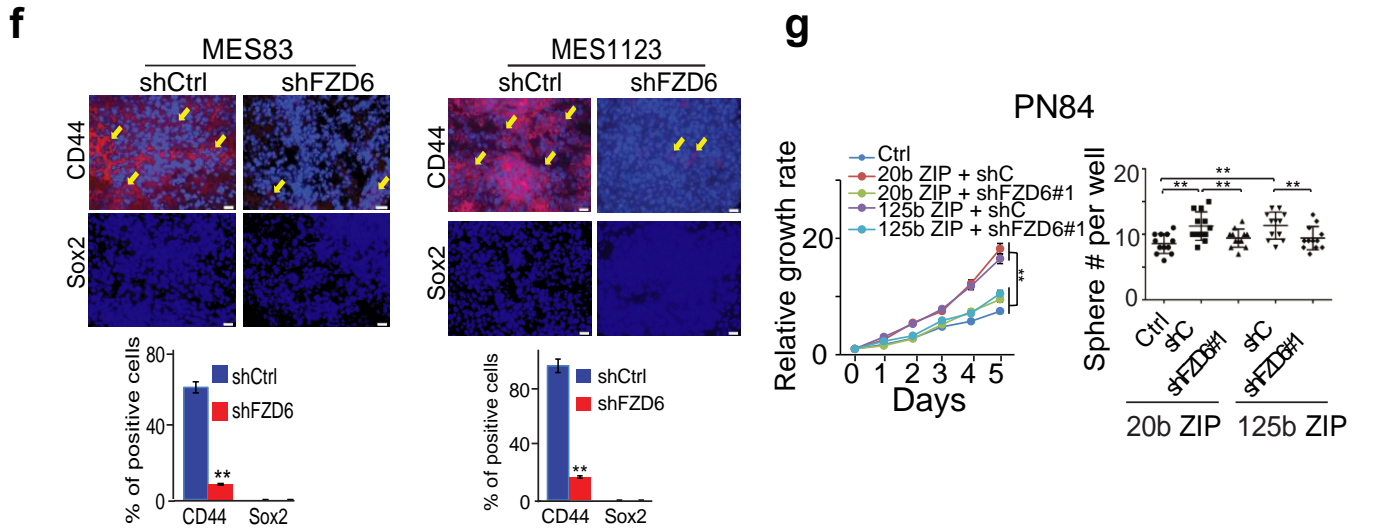

**Supplementary Figure 6 (Related to Figure 5)** miR-20b/miR-125b affected the cellular localization of  $\beta$ -catenin and inhibition of FZD6-impeded growth, self-renewal, and tumor growth of MES glioma spheres, **(a)** Left panels, IB analyses. Protein levels of  $\beta$ -catenin in cytoplasmic (C) and nucleus (N) were examined by IB using the indicated antibodies in miR-transduced MES 1123, or miRZIP-transduced PN 157. GAPDH and histone H3 were used as cytoplasmic and nuclear protein markers, respectively. Right panels, immunofluorescence staining of subcellular  $\beta$ -catenin localization in the indicated cells using indicated antibodies. Scale bar, 20  $\mu$ m. **(b)** Cell proliferation of MES83 and 1123 expressing shFZD6s or shC, with or without FZD6 rescued expression (#1/#2 targeting FZD6 ORF, while #3 targeting FZD6 3'UTR). **(c)** Neurosphere formation of MES 1123 expressing shFZD6s or shC, with or without FZD6 rescued expression. **(d)** Knockdown of FZD6 #3 inhibited tumor growth of MES 1123 GBM xenografts in the brain, whereas re-expression of FZD6, but not a vector control, rescues shFZD6 #3-inhibited tumor growth (n = 5). **(e)** Tumor areas of indicated group in **(d)** and in Fig. 5g were quantified. Scale bar: 1.0 mm. **(f)** Immunofluorescent IHC analyses of protein expression of CD44 and Sox2 in brain tumor xenografts established by MES 83 and 1123 glioma spheres that separately express shRNA for FZD6 (shFZD6#1), or a control shRNA (shCtrl). Scale bar: 20  $\mu$ m. Yellow arrows indicate positively stained cells. Bar graphs below show quantitation of positively stained cells. Data were collected from three separate tumors per group and five images per tumor. **(g)** Cell proliferation (left) and neurosphere formation (right) of PN 84 expressing miR-20b ZIP, miR-125b ZIP, or a control miRZIP with or without FZD6 knockdown. Error bars (s.d.) represent data of triplicate samples for each set of experiments. \*p < 0.01, \*\*p < 0.01, paired two-way Student t-test. Data are representative from three independent experiments with similar results.

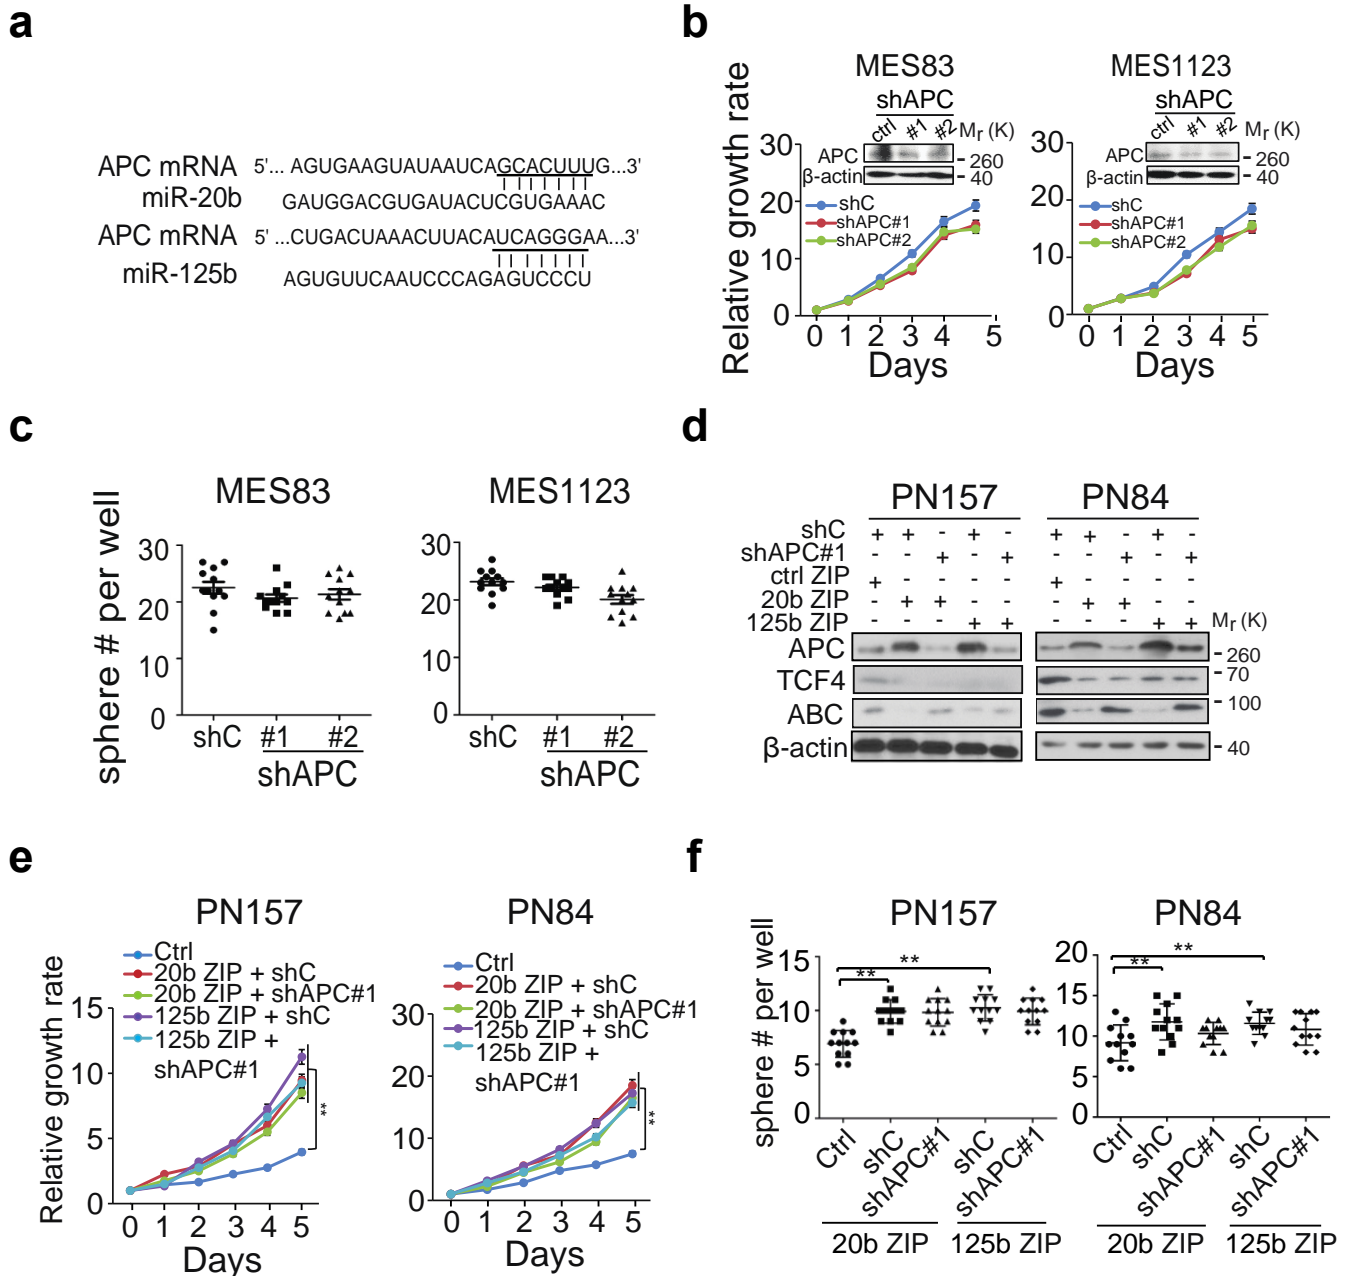

**Supplementary Figure 7 (Related to Figure 5)** (a) Targeting sites of miR-20b and miR-125b in 3'-UTR downstream of the coding sequences of APC gene. Nucleotides complementary to the seed sequence of miR-20b and miR-125b are underlined. (b,c) Inhibition of APC exhibited negligible effects on cell growth and self-renewal of glioma spheres. Cell proliferation (b) and neurosphere formation assay (c) were performed in MES 83 and 1123 expressing a control shRNA or APC specific shRNAs. Inserts: IB of shRNA knockdown of APC in glioma spheres using the indicated antibodies. (d) IB analysis. Effects of shRNA knockdown of APC with or without expression of miR-20b ZIP, miR-125b-ZIP, or a control Zip on expression of TCF4 and active  $\beta$ -catenin (ABC) in PN 157 or 84. (e,f), Effects of inhibition of APC (shRNA knockdown) or miRs (miRZIP inhibition) on cell proliferation (e) and neurosphere formation (f) of PN 157 and 84. Error bars (s.d.) represent data of triplicate samples for each set of experiments. \*\*p < 0.01, paired two-way Student t-test. Data are representative from three independent experiments with similar results.

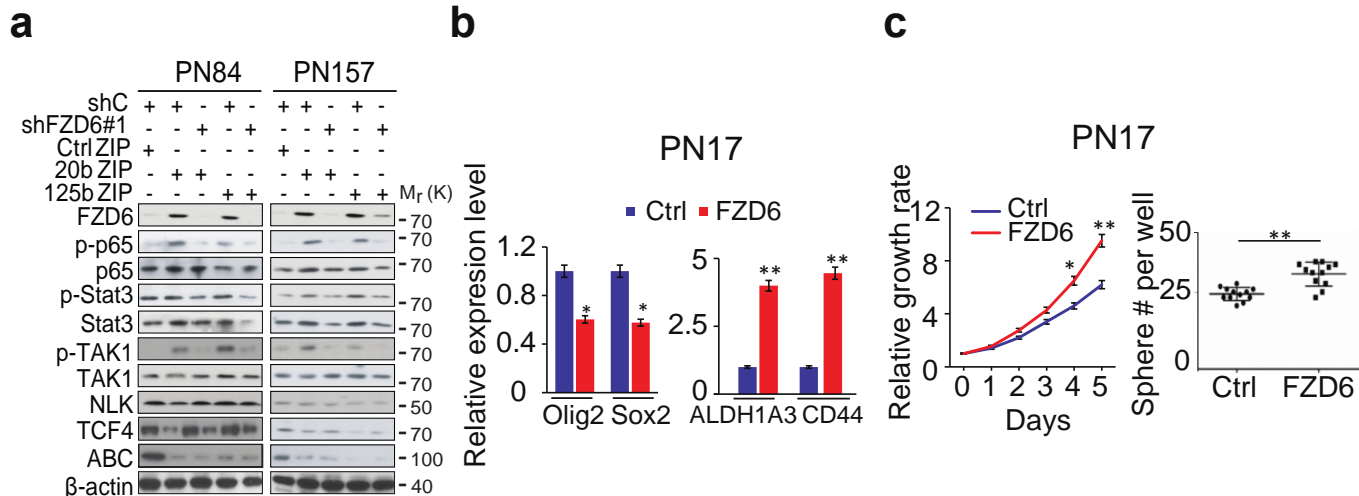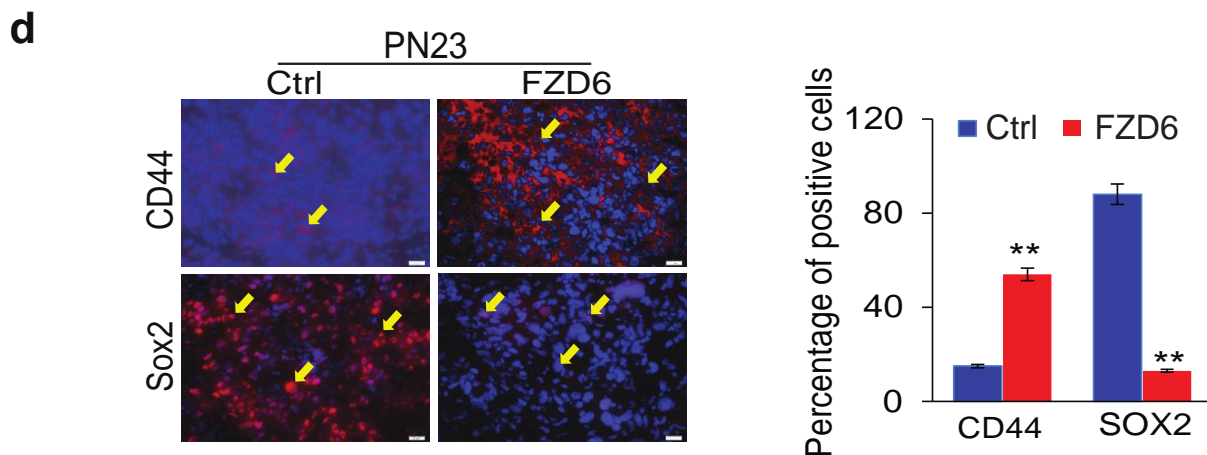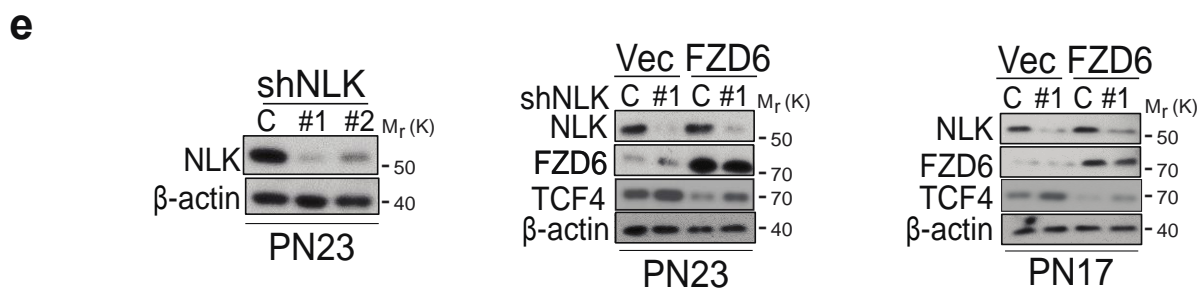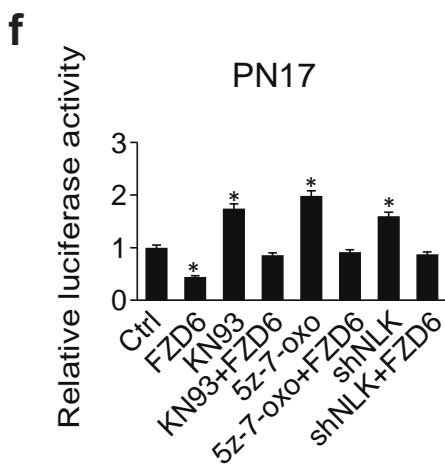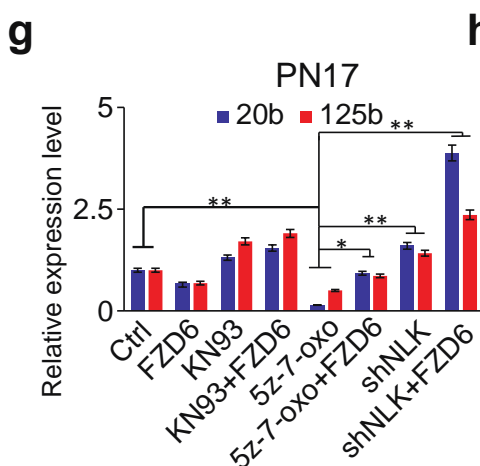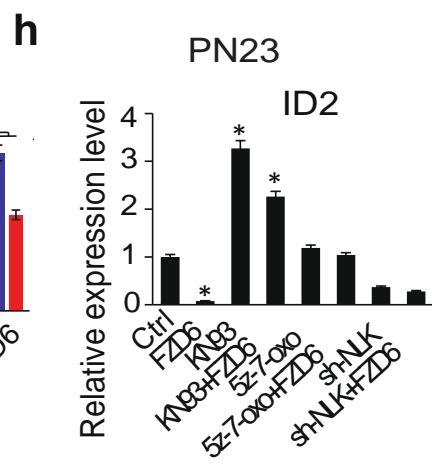

**Supplementary Figure 8, (Related to Figure 6)** FZD6 regulates properties of glioma spheres and miR-125b and miR-20b expression through the CaMKII-TAK1-NLK signaling. **(a)** IB analysis using indicated antibodies on PN 84 and 157 that express miR-20b ZIP or miR-125b ZIP with or without knockdown of FZD6. shC, a control scrambled shRNA. Ctrl: control. **(b)** qRT-PCR analysis of PN-associated markers (*Olig2* and *Sox2*) and MES-associated markers (*ALDH1A3* and *CD44*). **(c)** Cell proliferation (left) and sphere formation assays (right) of PN 17 spheres with FZD6 overexpression. **(d)** Immunofluorescent IHC analyses of protein expression of CD44 and Sox2 in brain tumor xenografts established by PN 23 spheres that express FZD6, or a control vector (Ctrl). Scale bar: 20  $\mu$ m. Yellow arrows indicate positively stained cells. Right bar graph is the quantitation of positively stained cells. Data were collected from 3 separate tumors per group and 5 images per tumor. **(e)** IB analysis using indicated antibodies on PN 23 and 17 spheres with or without NLK knockdown and FZD6 overexpression. **(f)** Luciferase reporter assay using a lentivirus TOP Flash/FOP Flash to quantify relative Wnt signaling activity on PN 17 spheres that overexpress FZD6 or a control vector with or without treatments of CaMKII Inhibitor KN93 (5  $\mu$ M), TAK1 inhibitor 5Z-7-oxo (5  $\mu$ M), or shNLK lentivirus. **(g,h)** qRT-PCR analysis of the relative expression of miR-20b, miR-125b and a Wnt target gene ID2 in PN 17 **(g)** or 23 **(h)** spheres that overexpress FZD6 or a control vector, with or without various treatments as indicated. Error bars (s.d.) represent data of triplicate samples for each set of experiments. . \*p <0.05, \*\*p <0.01, paired two-way Student t-test. Data are representative from three independent experiments with similar results.

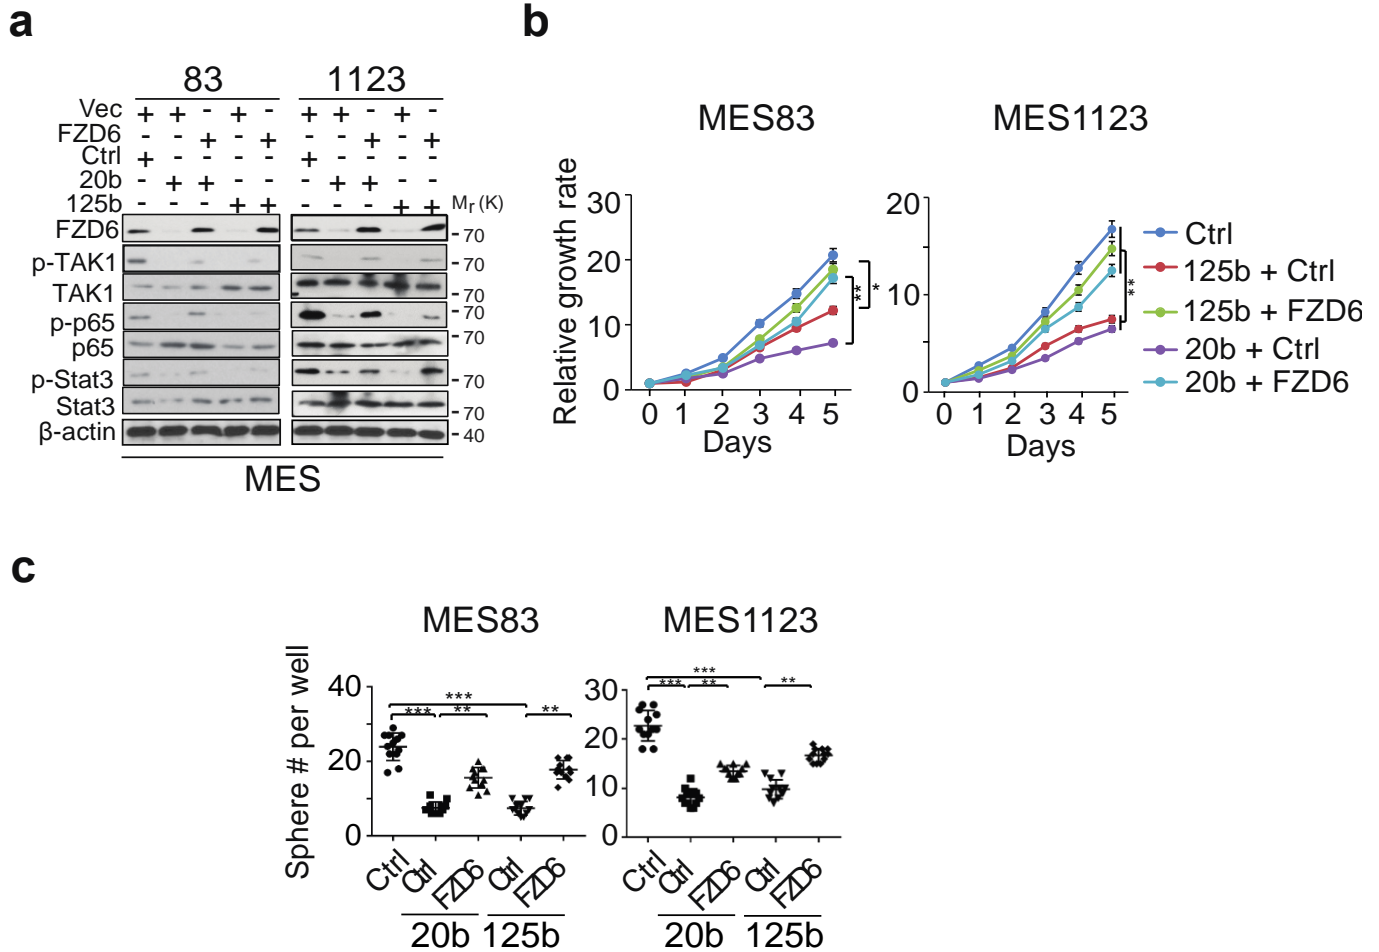

**Supplementary Figure 9 (Related to Figure 6)** miR-20b, miR-120b and FZD6 regulate downstream effectors of FDZ6, TAK1, NF- $\kappa$ B and STAT3 and self-renewal, and cell growth of MES glioma spheres. (a) IB analysis using indicated antibodies. (b) Cell proliferation and (c) neurosphere formation assay of MES 83 and 1123 that expressed miR-20b, miR-125b or a control miRNA with or without FZD6 overexpression. Error bars (s.d.) represent data of triplicate samples for each set of experiments. . \*p <0.05, \*\*p <0.01, \*\*\*p <0.001, paired two-way Student t-test. Data are representative from three independent experiments with similar results.



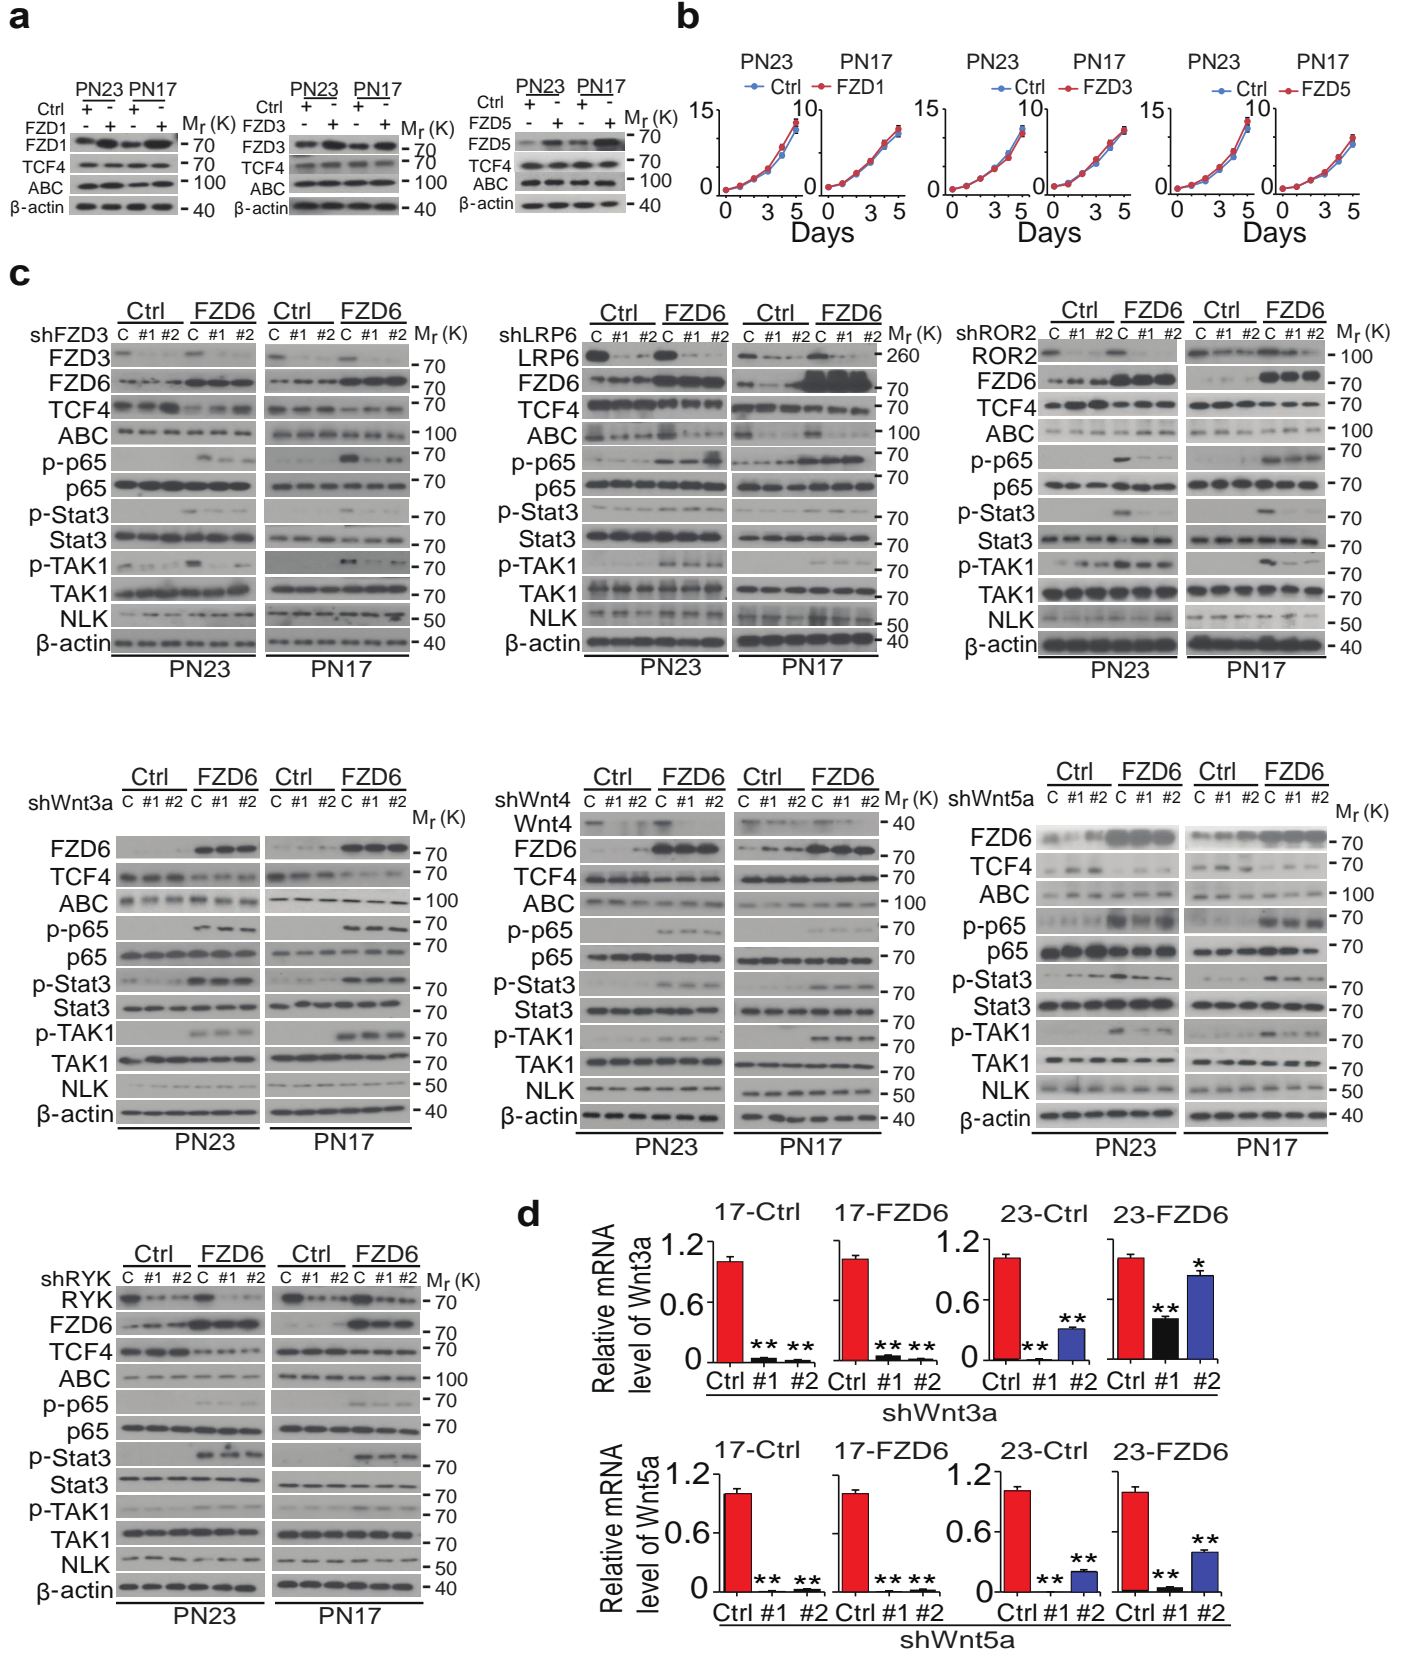

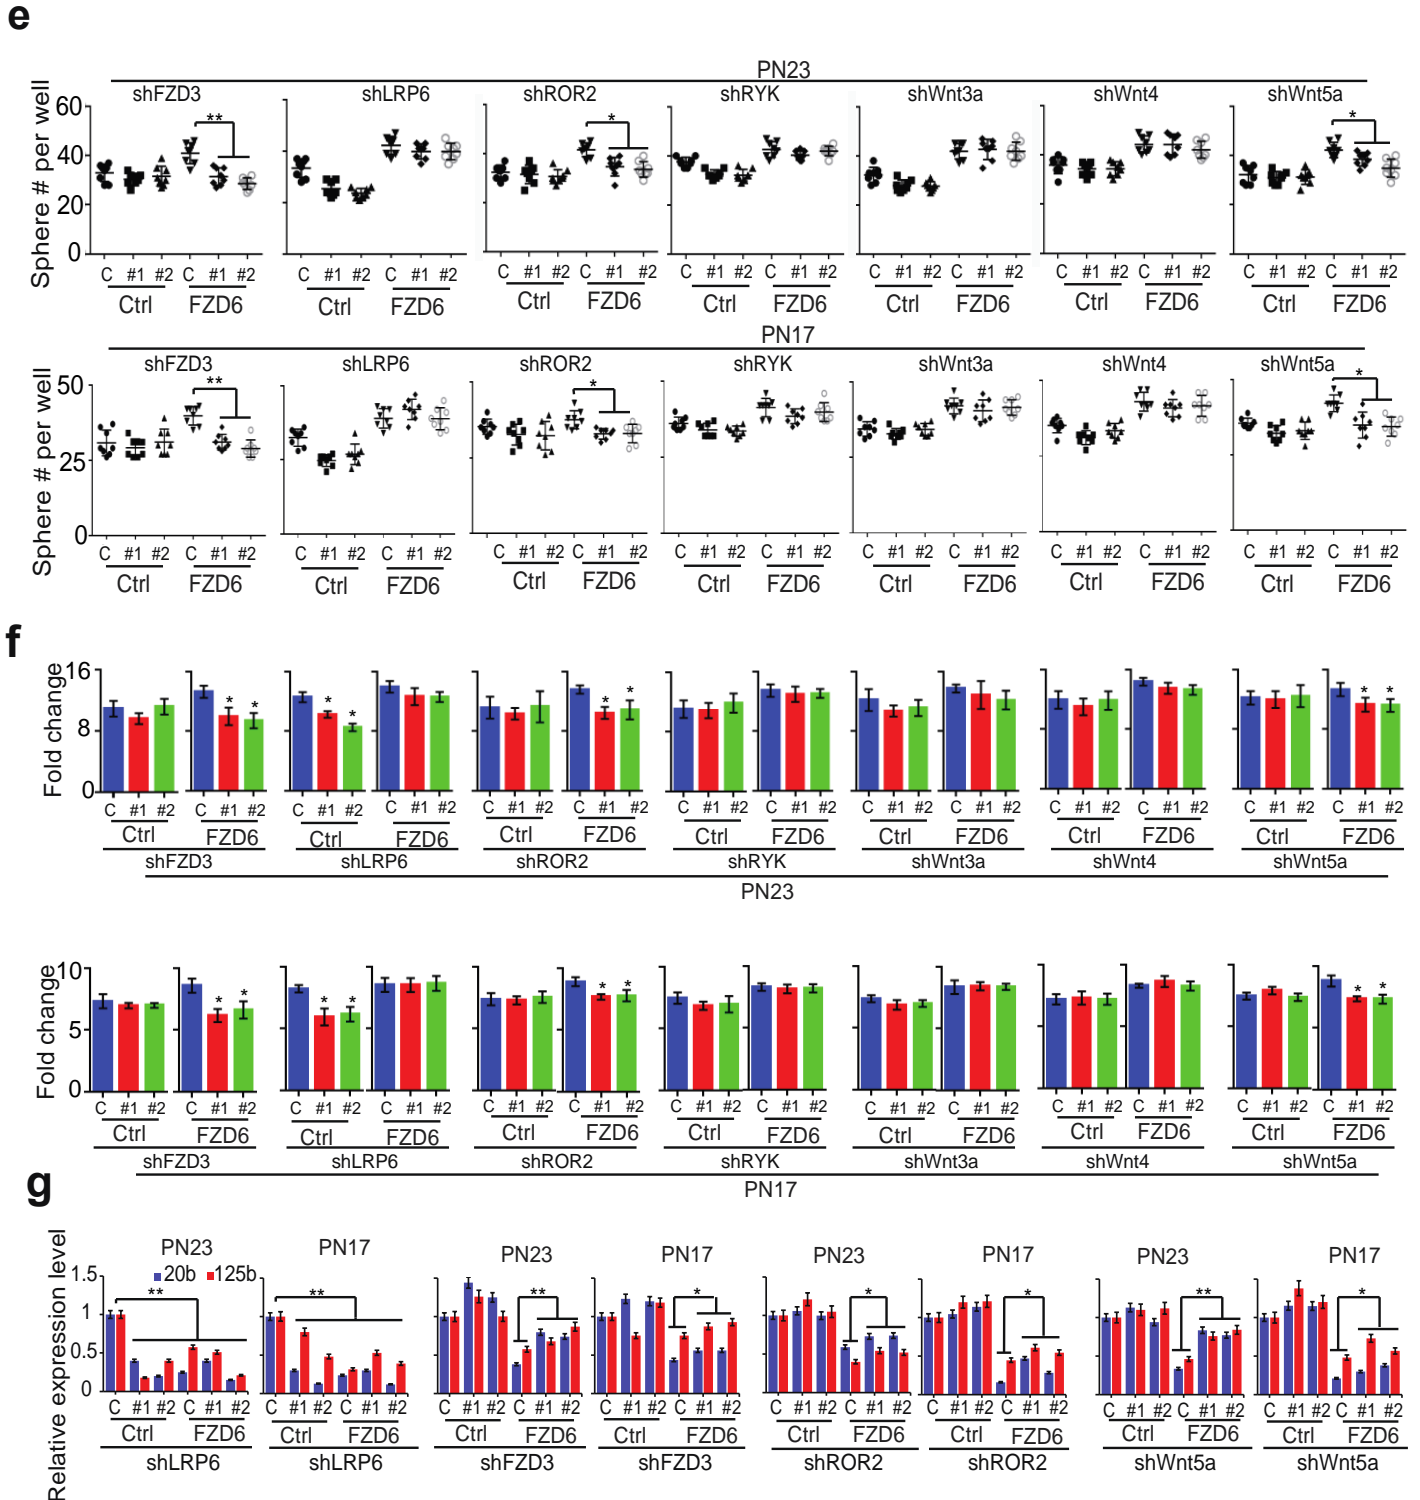

**Supplementary Figure 10. (Related to Figure 6) FZD3, ROR2 and Wnt5a are involved in FZD6 overexpression-induced phenotypes in glioma PN spheres. (a) IB analysis on PN 23 and 17 spheres with or without FZD1, FZD3 or FZD5 overexpression using indicated antibodies. (b) Cell proliferation assays on PN 23 and 17 spheres with or without FZD1, FZD3 or FZD5 overexpression. (c) IB analysis using indicated antibodies on PN 23 and 17 expressing FZD6**

or a control vector, with or without knockdown of FZD3, LRP6, ROR2, RYK, WNT3a, WNT4 or WNT5a. C: a control shRNA, shRNA #1/#2 are the specific shRNAs of indicated gene. **(d)** Due to incapability of detecting WNT3a and WNT5a using IB with commercial available antibodies, qRT-PCR analyses were used to validate mRNA expression of WNT3a and WNT5a in PN 23 and 17 expressing FZD6 or a control vector with or without knocking down of WNT3a or WNT5a. **(e)** Neurosphere formation assays, and **(f)** cell proliferation were analyzed in indicated glioma spheres. **(g)** qRT-PCR analysis of the relative expression of miR-20b and miR-125b in indicated PN spheres. Error bars (s.d.) represent data of triplicate samples for each set of experiments. . \*p <0.05, \*\*p <0.01, paired two-way Student t-test. Data are representative from three independent experiments with similar results.

**a**

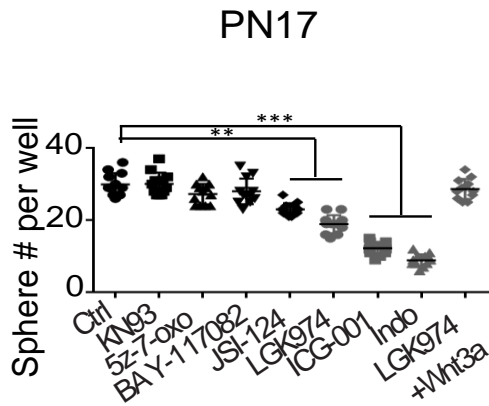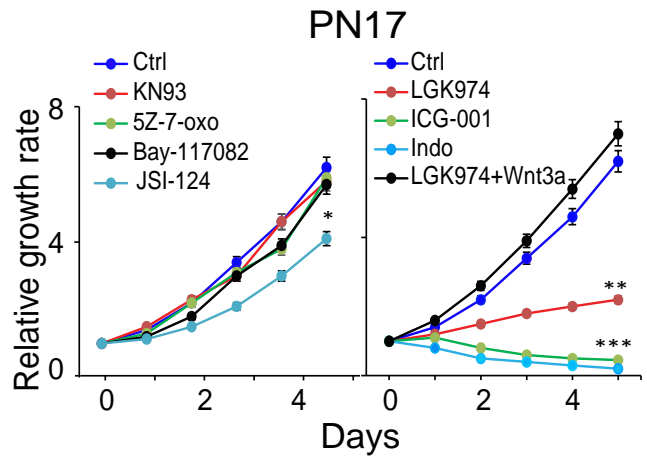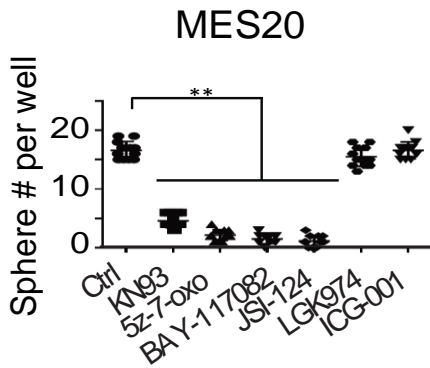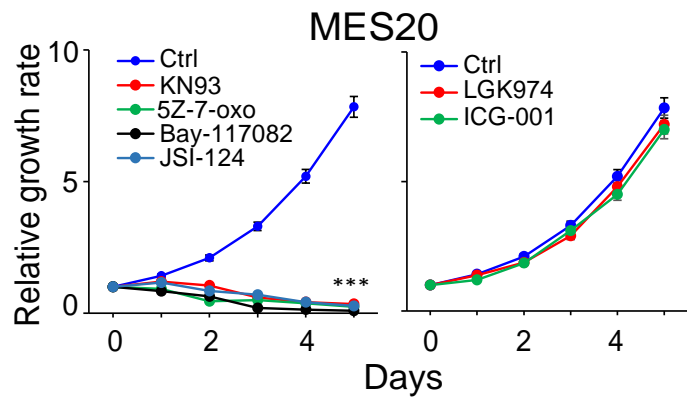

**b**

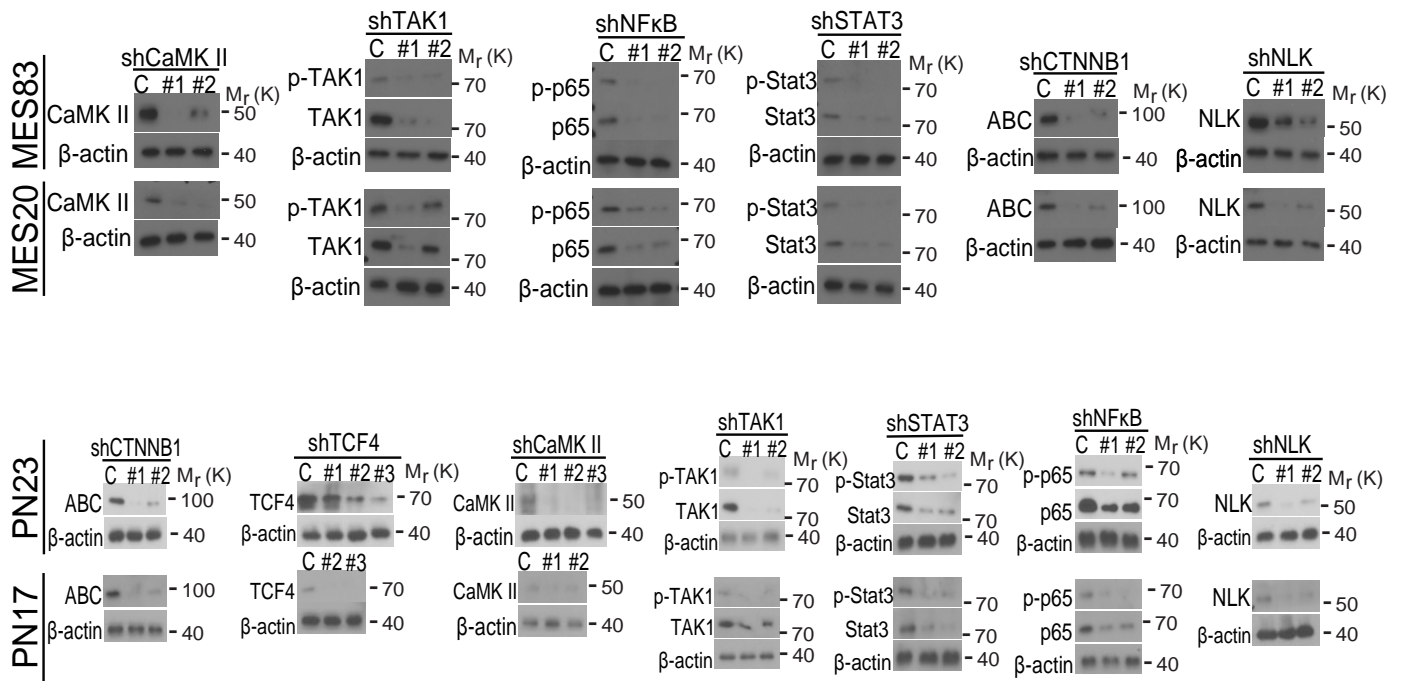

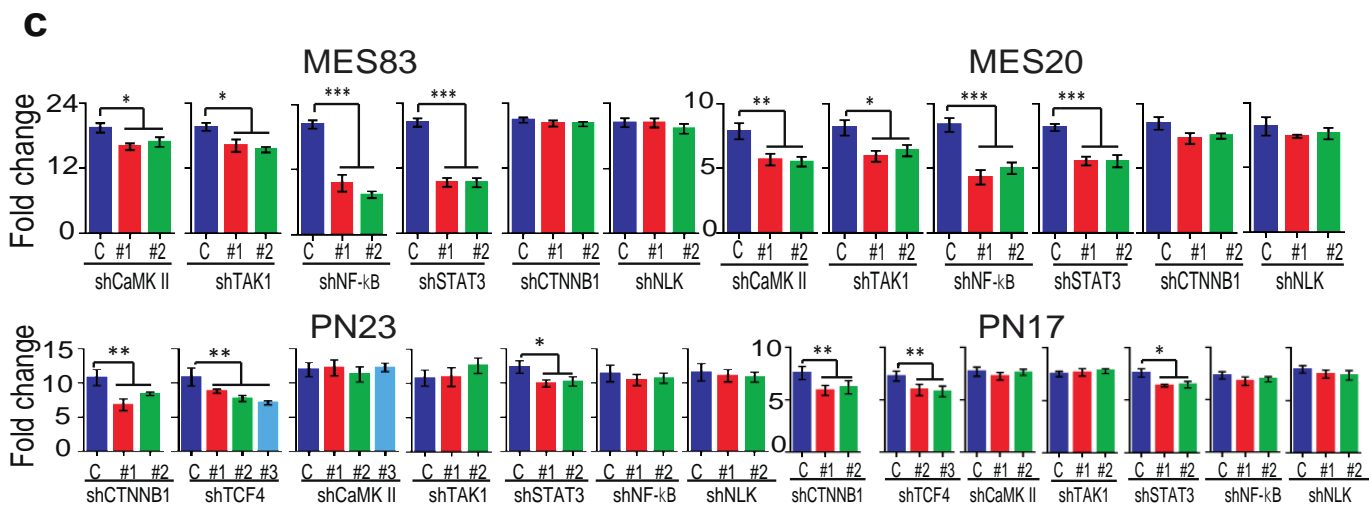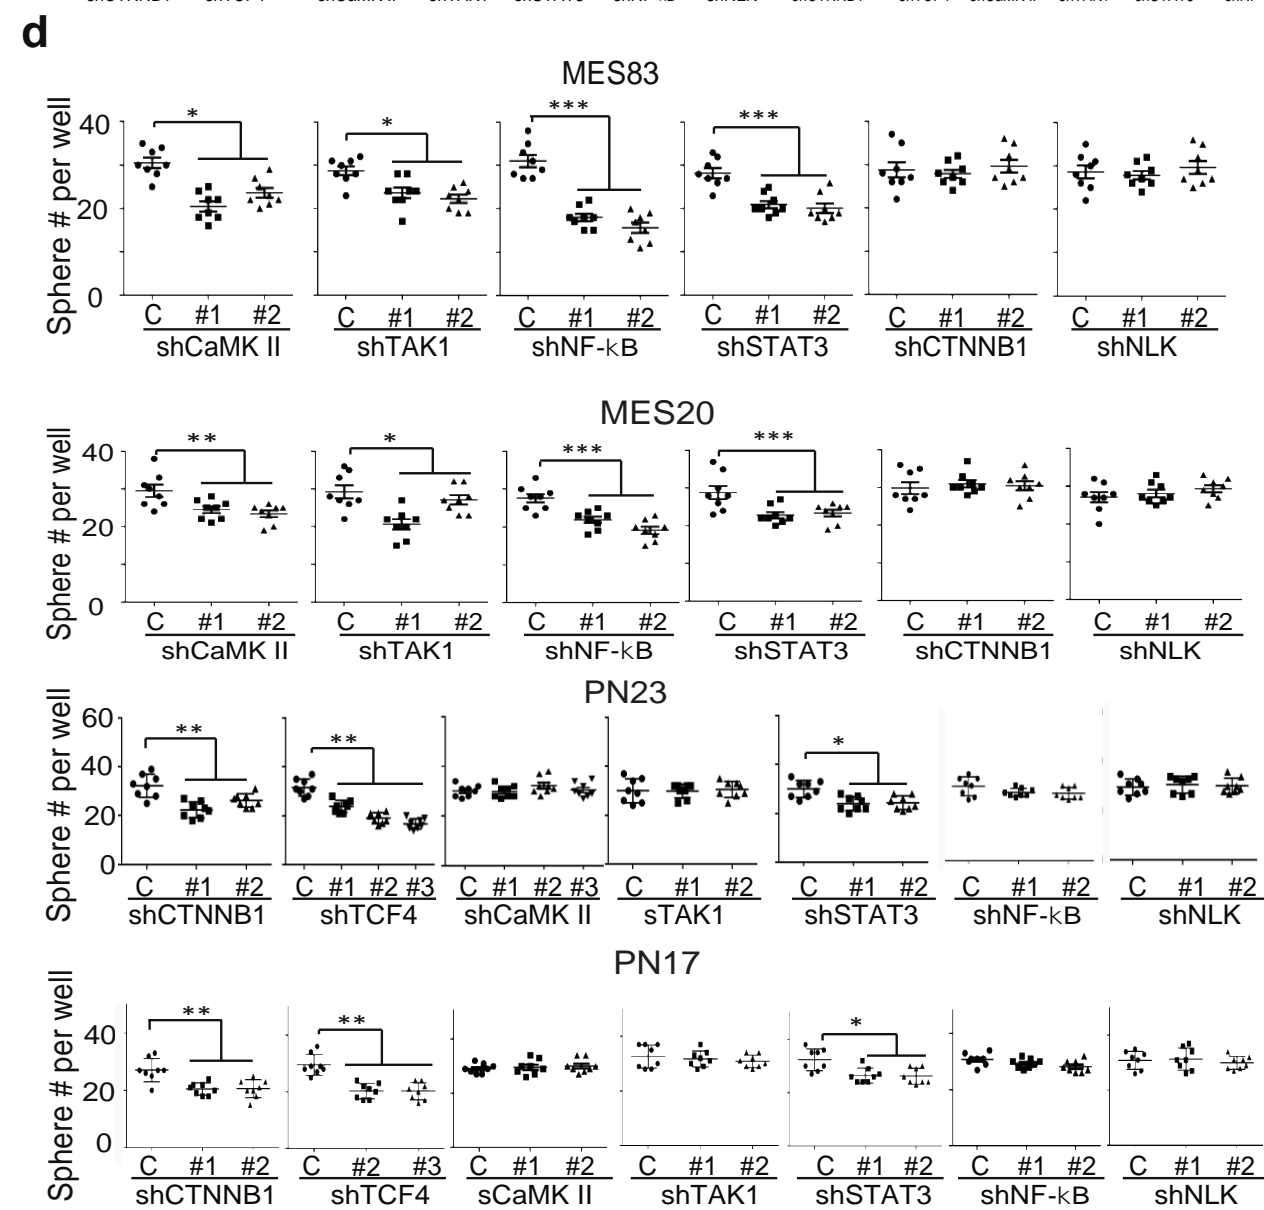

**Supplementary Figure 11 (Related to Figure 7)** Targeting key components of differentially activated signaling pathways effectively inhibited distinct GBM subtypes. **(a)** Neurosphere formation (left) and cell proliferation (right) of indicated glioma spheres treated with DMSO (Ctrl), KN93 (5  $\mu$ M), 5Z-7-oxo (5  $\mu$ M), BAY-117082 (5  $\mu$ M), JSI-124 (0.1  $\mu$ M), LGK974 (5  $\mu$ M), ICG-001 (5  $\mu$ M) or LGK974 (5  $\mu$ M) + WNT3a (200 ng/ml), respectively. **(b)** IB analysis using indicated antibodies on MES 83 and 20, PN 23 and 17 glioma spheres expressing control or specific shRNAs targeting CaMKII,  $\beta$ -catenin (CTNNB1), TCF4, TAK1, NF- $\kappa$ B, STAT3, and NLK, respectively. **(c)** Cell proliferation and **(d)** neurosphere formation assays were analyzed on MES 83 and 20, PN 23 and 17 glioma spheres expressing control or specific shRNAs targeting CaMKII, CTNNB1, TCF4, TAK1, NF- $\kappa$ B, STAT3 and NLK, respectively. Error bars (s.d.) represent data of triplicate samples for each set of experiments. \*p <0.05, \*\*p <0.01, \*\*\*p <0.001, paired two-way Student t-test. Data are representative from three independent experiments with similar results.

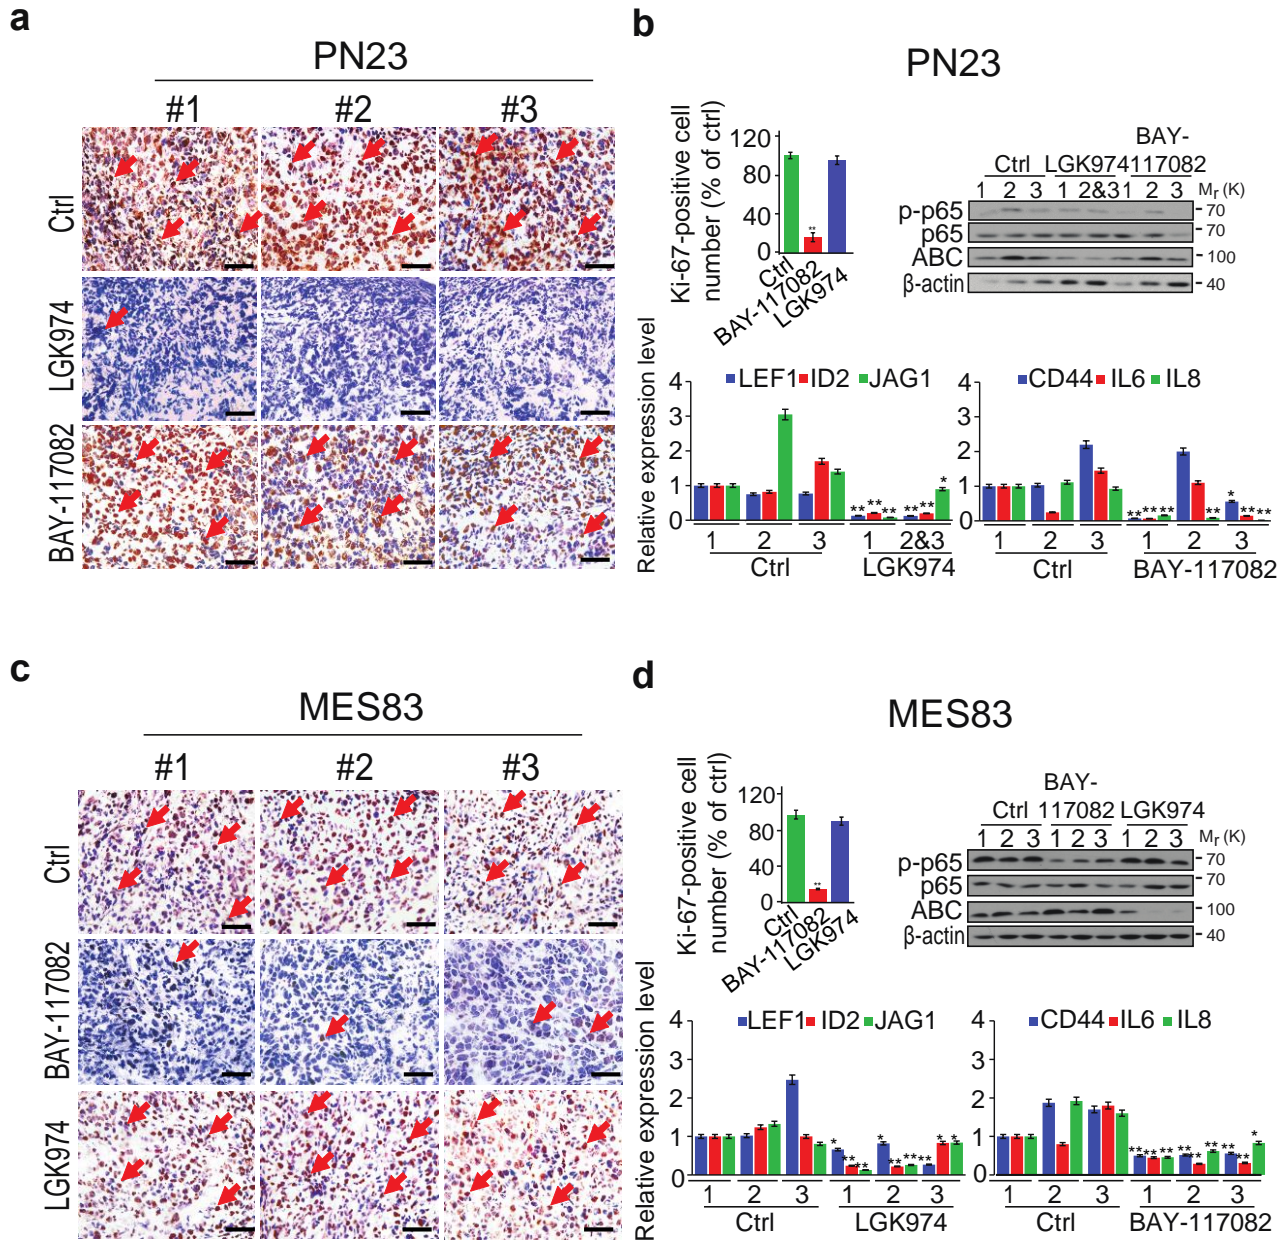

**Supplementary Figure 12 (Related to Figure 7)** Pathway-specific inhibitors selectively inhibited growth of PN and MES glioma sphere tumor xenografts established by PN 23 (**a,b**) and MES 83 (**c,d**) glioma spheres and Wnt- and NF- $\kappa$ B signaling *in vivo*. (**a,c**), IHC images of Ki-67 stained individual PN 23 or MES 83 glioma sphere tumor xenografts. Scale bar, 50  $\mu$ m. (**b,d**), Upper left, quantification of Ki-67-positive cells up right, IB of p-p65, p65 and activated  $\beta$ -catenin (ABC) in tumor lysates, lower graphs, qRT-PCR analysis of Wnt pathway target genes, LEF1, ID2 and JAG1 and NF- $\kappa$ B target genes CD44, IL6 and IL8, respectively. In PN GBM tumors, Wnt inhibitor LGK974, but not NF- $\kappa$ B inhibitor BAY-117082, suppressed tumor growth and Wnt signaling. Conversely, in MES GBM tumors, NF- $\kappa$ B inhibitor BAY-117082, but not Wnt inhibitor LGK974, suppressed tumor growth and NF- $\kappa$ B signaling. Data in bar graphs in **b** and **d** were collected from three separate tumors per group and five images per tumor. Error bars (s.d.) represent data of triplicate samples for each set of experiments. \* $p < 0.05$ , \*\* $p < 0.01$ , \*\*\* $p < 0.001$ , paired two-way Student t-test. Data are representative from three independent experiments with similar results.

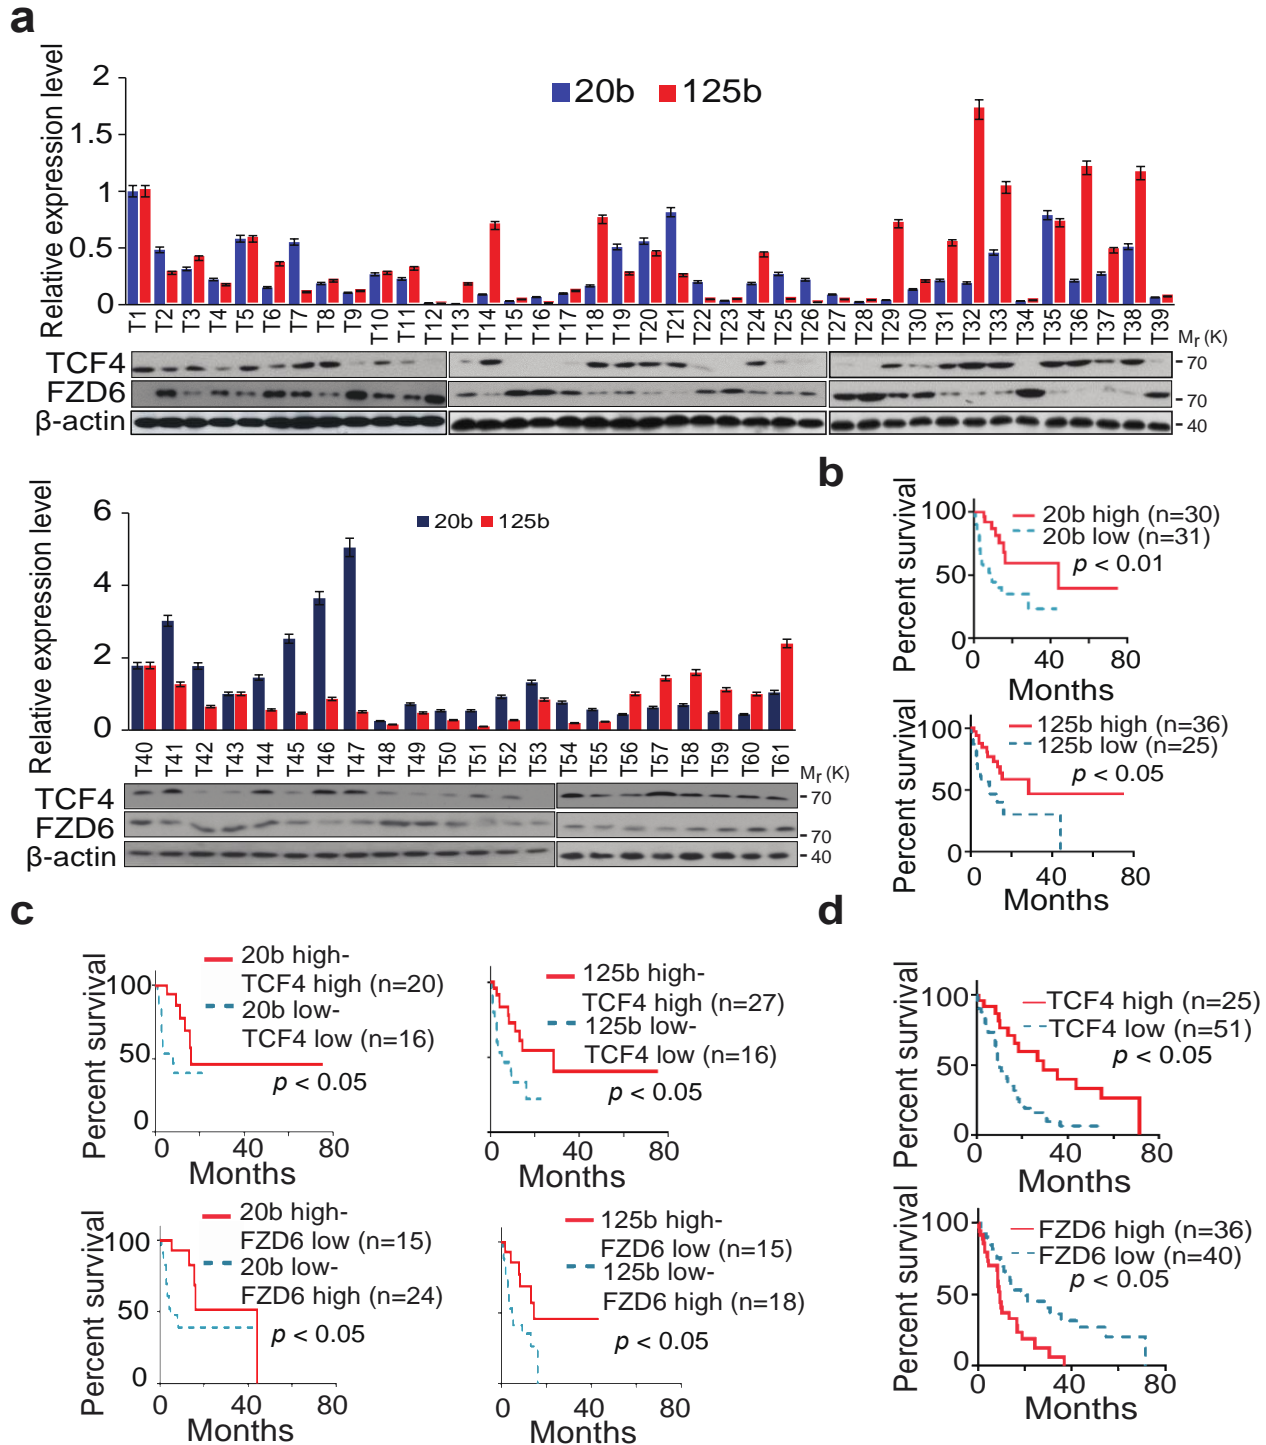

**Supplementary Figure 13 (Related to Figure 8)** Clinical correlations of expression levels of miR-20b, miR-125b, and TCF4 or FZD6 in clinical GBM tumors. **(a)** qPCR (upper bar graphs) for miR-20b and miR-125b, and IB analysis of 61 snap-frozen clinical GBM tumor specimens using indicated antibodies for expression of TCF4 and FZD6 (lower panels). **(b, c,)** Kaplan-Meier analyses of 61 snap-frozen GBM samples for expression of miR-20b or miR-125b **(b)**, in combination of miR-20b or miR-125b with TCF4 or FZD6 **(c)**. **(d)** Kaplan-Meier analyses of 76 paraffin-embedded GBM samples analyzed by IHC (see Figure 8c,d) for expression of TCF4 or FZD6. Error bars (s.d.) represent data of triplicate samples for each set of experiments.  $p$  values were calculated by using log-rank and Gehan-Breslow-Wilcoxon tests.



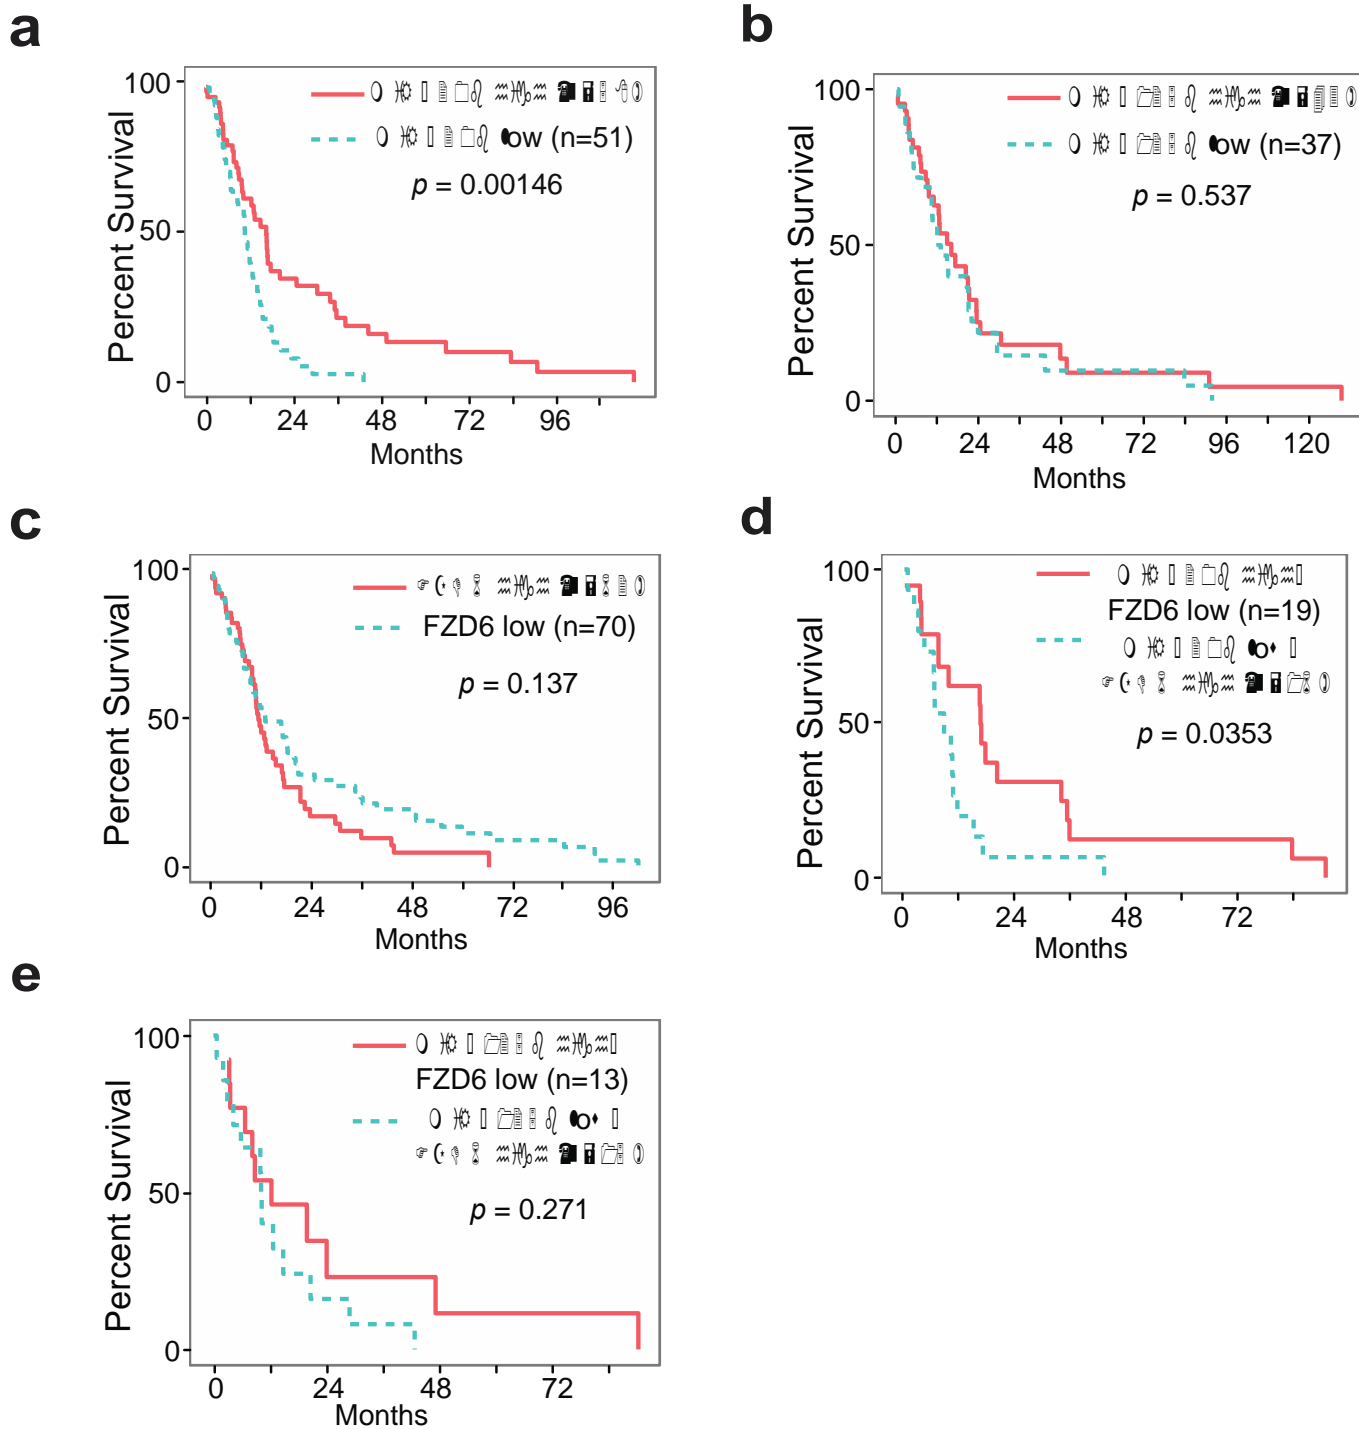

**Supplementary Figure 14 (Related to Figure 8e, 8f)** Clinical correlations of expression levels of miR-20b, miR-125b and FZD6 in PN and MES GBM tumors available in TCGA data sets. (a to e) Kaplan-Meier curves of PN and MES GBM tumors available in TCGA data sets were analyzed individually with miR-20b, miR-125b, FZD6, or in combination of miR-20b or miR-125b with FZD6. p values were calculated by using log-rank and Gehan-Breslow-Wilcoxon tests.

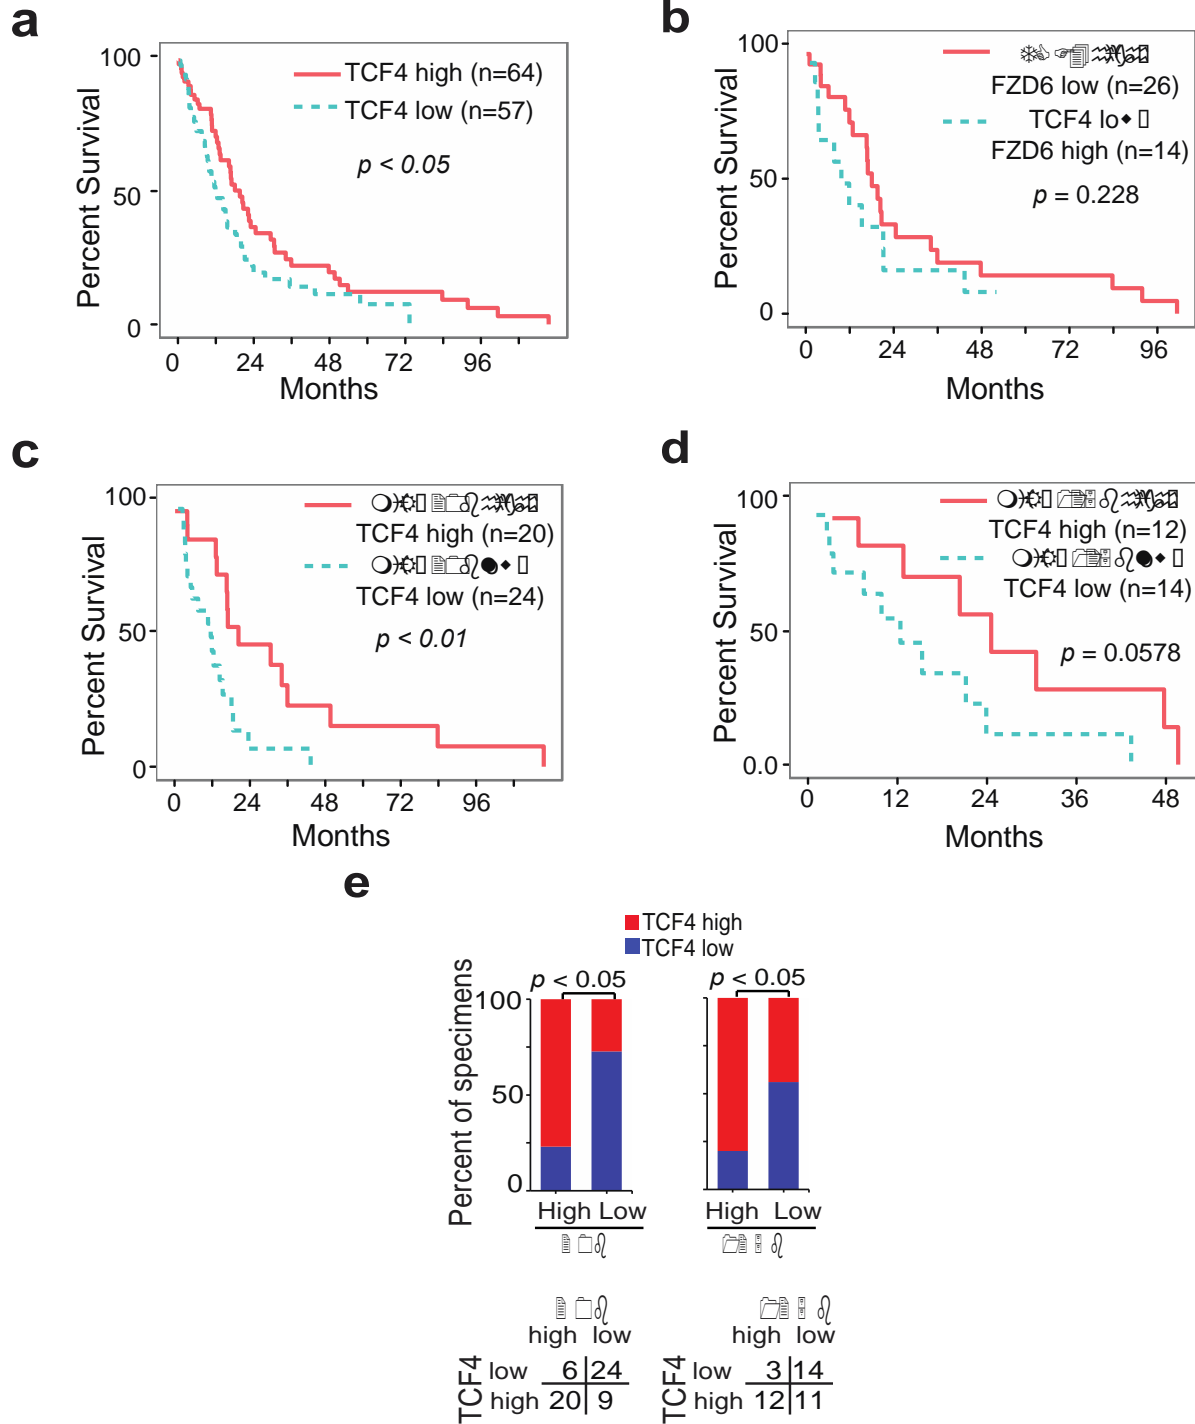

**Supplementary Figure 15 (Related to Figure 8e, 8f)** Clinical correlations of expression levels of miR-20b, miR-125b and TCF4 in in PN and MES GBM tumors available in TCGA data sets. (a to d) Kaplan-Meier curves of PN and MES GBM tumors available in TCGA data sets were analyzed individually with miR-20b, miR-125b, TCF4, or in combination of miR-20b or miR-125b with TCF4. (e) Percentages of specimens showing high or low miR-20b or miR-125b expression relative to level of TCF4 in TCGA data sets. p values were calculated by using log-rank and Gehan-Breslow-Wilcoxon tests.

Figure 3d

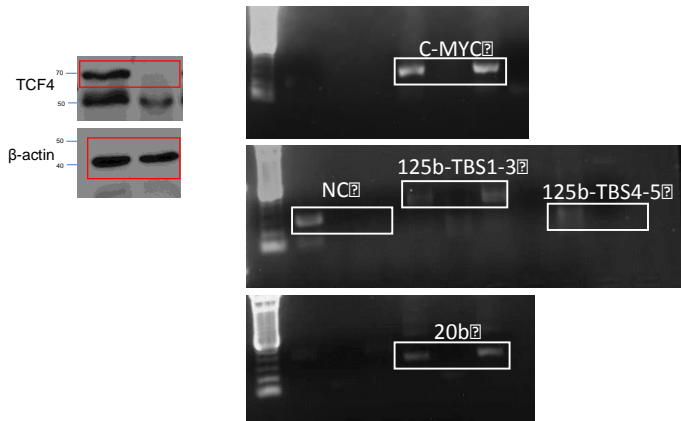

Figure 3g

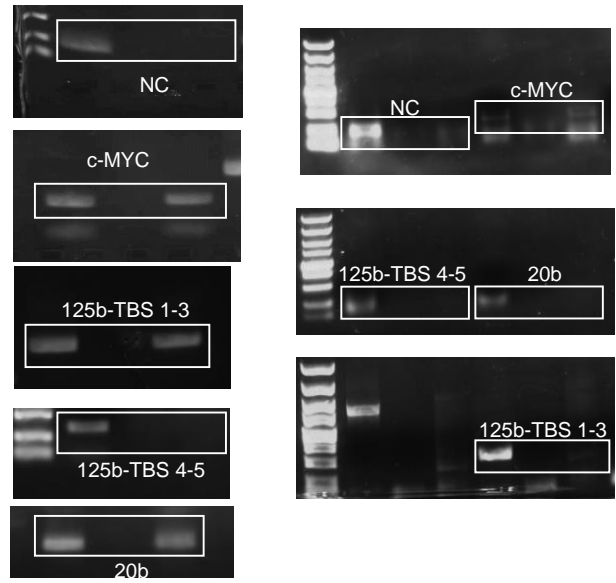

Figure 4c

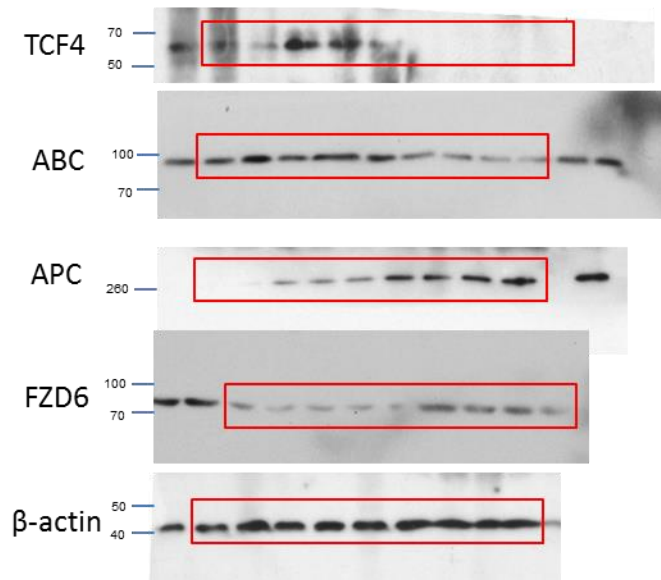

Figure 5a

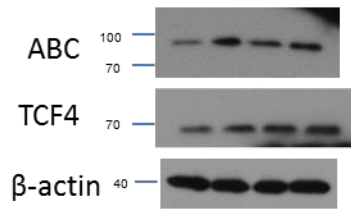

Figure 5d

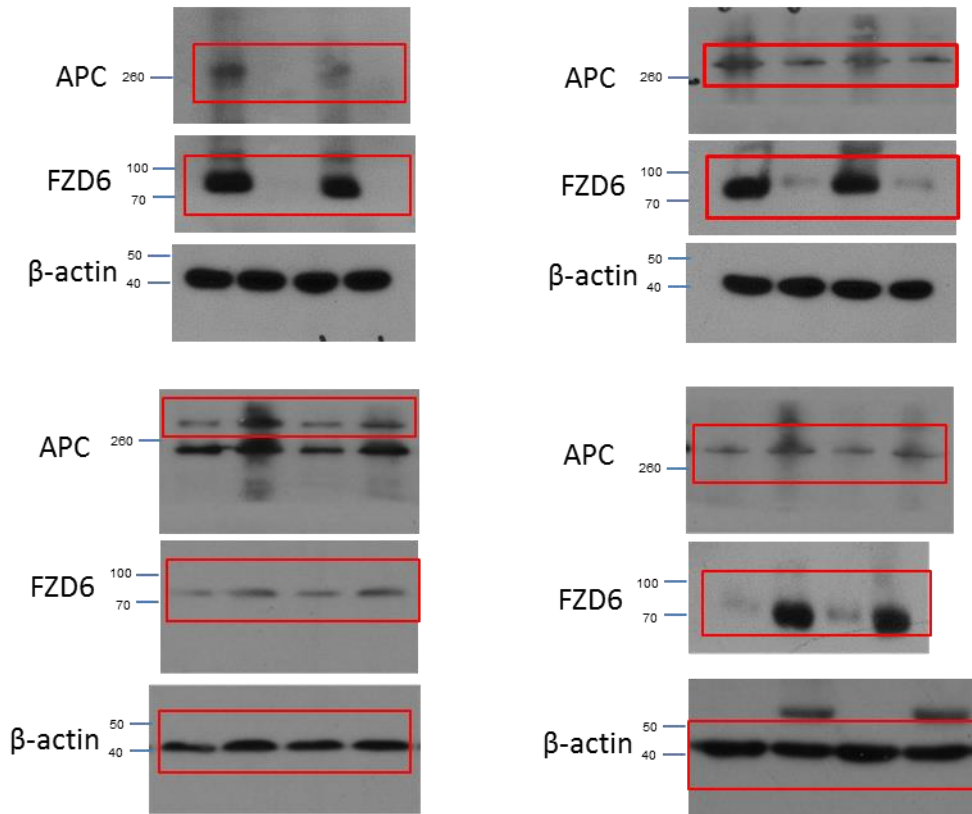

Figure 5e

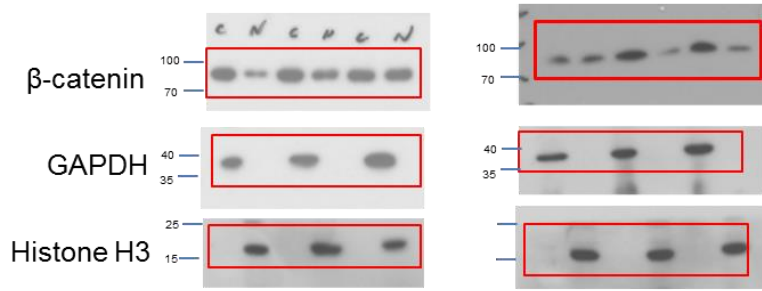

Figure 5g

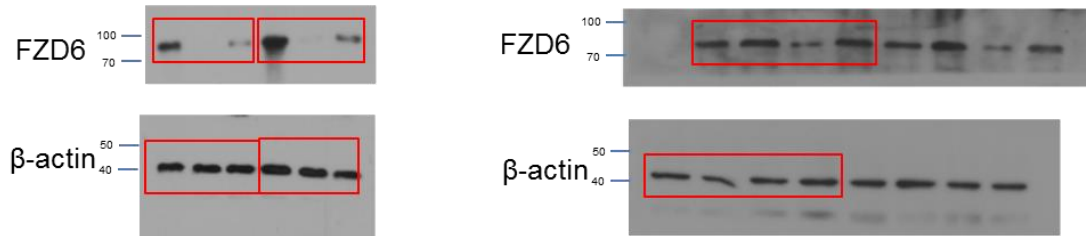

Figure 6a

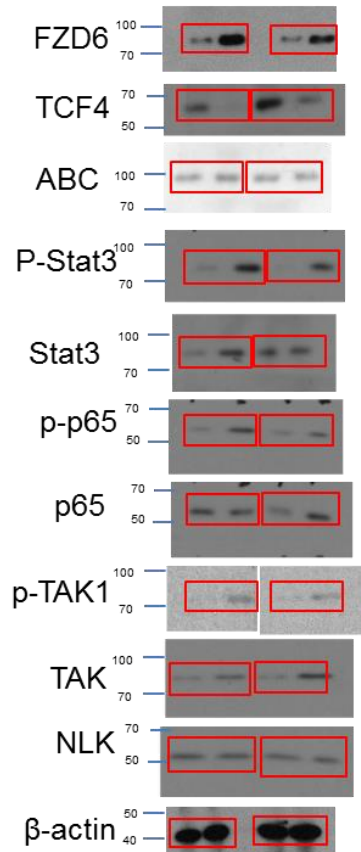

**Supplementary Figure 16: Uncropped scans of the IB data presented in the main text (Fig. 3 to 6).**

## Supplementary Table 1

### The list of primers used in this study

| S.No.                                                   | Gene                | Primer | Primer sequence                     |
|---------------------------------------------------------|---------------------|--------|-------------------------------------|
| <b>Quantitative Reverse Transcription (qRT) primers</b> |                     |        |                                     |
| 1                                                       | <i>ALDH1A3</i>      | F      | GCATGAGCCCATTGGTGTCT                |
|                                                         |                     | R      | CGCAGGCTTCAGGACCAT                  |
| 2                                                       | <i>APC</i>          | F      | AAGCATGAAACCGGCTCACAT               |
|                                                         |                     | R      | CATTTCGTGTAGTTGAACCCTGA             |
| 3                                                       | <i>APC</i> (3'UTR)  | F      | AAGAGAGGAAGAATGAAACTAAGAAAATTC      |
|                                                         |                     | R      | GCAAAGTGCTGATTATACTTCACTGCTG        |
| 4                                                       | <i>FZD6</i>         | F      | AGAGGTGAAAGCGGACGGA                 |
|                                                         |                     | R      | AGAGAGTCTGGAGATGGATGCT              |
| 5                                                       | <i>FZD6</i> (UTR)   | F      | AAACTCGAGTGGGAGGACAGAGTTAGAGGAA     |
|                                                         |                     | R      | AAAGCGGCCGCTCAGTGATAAAGCTACCAAAGTGC |
| 6                                                       | <i>HMGA2</i>        | F      | TCCCTCTAAAGCAGCTCAAAA               |
|                                                         |                     | R      | ACTTGTGTGGCCATTTCT                  |
| 7                                                       | <i>ID2</i>          | F      | GCTATACAACATGAACGACTGCT             |
|                                                         |                     | R      | AATAGTGGGATGCGAGTCCAG               |
| 8                                                       | <i>JAG1</i>         | F      | GGGGCAACACCTTCAACCTC                |
|                                                         |                     | R      | CCAGGCGAAACTGAAAGGC                 |
| 9                                                       | <i>LEF1</i>         | F      | ATGTCAACTCCAAACAAGGCA               |
|                                                         |                     | R      | CCCGGAGACAAGGGATAAAAAGT             |
| 10                                                      | <i>Olig2</i>        | F      | CTCCTCAAATCGCATCCAGA                |
|                                                         |                     | R      | AGAAAAAGGTCATCGGGCTC                |
| 11                                                      | <i>pri-miR-125b</i> | R      | AGAAAAAGGTCATCGGGCTC                |
|                                                         |                     | F1     | CCATACCACCTGTTTGTTCATCT             |
| 12                                                      | <i>pri-miR-125b</i> | R1     | CTGAGAGGAGCGCAACAATGT               |
|                                                         |                     | F2     | GAAGAATTCTACCGCATCAAACCA            |
|                                                         |                     | R2     | CTGCAGACAATCAATAAGGTCCAA            |
| 13                                                      | <i>SOX2</i>         | F      | CCCTGCTGAGAATAGGACAT                |
|                                                         |                     | R      | CCCTGCAGTACAACCTCTATG               |
| 14                                                      | <i>TCF4</i>         | F      | TCCCACCACATCATACGCTACAC             |
|                                                         |                     | R      | TCGCTTGCTCTTCTCTGGACAG              |
| 15                                                      | <i>AXIN2</i>        | F      | TAACTCCTTATTGGGCGATCA               |
|                                                         |                     | R      | TTGGCTACTCGTAAAGTTTTGGT             |
| 16                                                      | <i>WNT1</i>         | F      | CGGCGTTTATCTTCGCTATCA               |

|    |        |   |                         |
|----|--------|---|-------------------------|
|    |        | R | GCAGGATTCGATGGAACCTTCT  |
| 17 | WNT10A | F | GGAGACTCGCAACAAGATCCC   |
|    |        | R | CGATGGCGTAGGCAAAAGC     |
| 18 | WNT10B | F | GTGAGCGAGACCCCACTATG    |
|    |        | R | CACTCTGTAACCTTGCACTCATC |
| 19 | WNT11  | F | GACCTCAAGACCCGATACCTG   |
|    |        | R | TAGACGAGTTCCGAGTCCTC    |
| 20 | WNT16  | F | GCAGAGAATGCAACCGTACAT   |
|    |        | R | CACATGGGTGTTGTAACCTCG   |
| 21 | WNT2   | F | GCCTTTGTTTATGCCATCTCCT  |
|    |        | R | CTTGGCGCTTCCCATCTTCTT   |
| 22 | WNT2B  | F | CGGGACCACACCGTCTTTG     |
|    |        | R | GCGAGTAATAGCGTGACTAC    |
| 23 | WNT3   | F | GGAGAGGGACCTGGTCTACTA   |
|    |        | R | CTTGTGCCAAAGGAACCCGT    |
| 24 | WNT3A  | F | AGCTACCCGATCTGGTGGTC    |
|    |        | R | CAAACCTCGATGTCCTCGCTAC  |
| 25 | WNT4   | F | GTACGCCATCTCTTCGGCAG    |
|    |        | R | GCGATGTTGTCAGAGCATCCT   |
| 26 | WNT5A  | F | TCGACTATGGCTACCGCTTTG   |
|    |        | R | CACTCTCGTAGGAGCCCTTG    |
| 27 | WNT5B  | F | CGCTTCGCCAAGGAGTTTG     |
|    |        | R | TGCCATCTTATACACAGCCCT   |
| 28 | WNT6   | F | GGTGCGAGAGTGCCAGTTC     |
|    |        | R | CGTCTCCCGAATGTCCTGTT    |
| 29 | WNT7A  | F | CTGTGGCTGCGACAAAGAGAA   |
|    |        | R | GCCGTGGCACTTACATTCC     |
| 30 | WNT7B  | F | CGCAGCTATCAGAAGCCCAT    |
|    |        | R | CAGGTGTTGCACTTGACGA     |
| 31 | WNT8A  | F | GAAGTGCCTGAAAATGCTCT    |
|    |        | R | TCGAAGTCACCCATGCTACAG   |
| 32 | WNT8B  | F | AAGGCCGAGAGTGCCTAAG     |
|    |        | R | CTGCGCGGCTACAGAAGTA     |

|    |                     |    |                          |
|----|---------------------|----|--------------------------|
| 33 | <i>WNT9A</i>        | F  | CCACCGTGAGAAGAAGACTGC    |
|    |                     | R  | GCCTGCACTCCACATAGCA      |
| 34 | <i>WNT9B</i>        | F  | TGTGCGGTGACAACCTCAAG     |
|    |                     | R  | ACAGGAGCCTGATACGCCAT     |
| 35 | <i>FZD1</i>         | F  | GGGGCTTAACAACGTGGAC      |
|    |                     | R  | CAGAAAGGACGTGCCGATAAA    |
| 36 | <i>FZD2</i>         | F  | GTGCCATCCTATCTCAGCTACA   |
|    |                     | R  | CTGCATGTCTACCAAGTACGTG   |
| 37 | <i>FZD3</i>         | F  | AATATGGACGTGTCACACTTCC   |
|    |                     | R  | GGATATGGCTCATCACAATCTGG  |
| 38 | <i>FZD4</i>         | F  | GTGTCACTCTGTGGGAACCAA    |
|    |                     | R  | GGCTGTATAAGCCAGCATCAT    |
| 39 | <i>FZD5</i>         | F  | CCGTTCTGTGCAAGTGTC       |
|    |                     | R  | GAAGCGTTCATGTGATGAG      |
| 40 | <i>FZD7</i>         | F  | CAGACGTGCAAGAGCTATGC     |
|    |                     | R  | ACGATCATGGTCATCAGGTA     |
| 41 | <i>FZD8</i>         | F  | ATCTTGTGCTCACATGGTTC     |
|    |                     | R  | CATGGTGCCGATGAAGAGGTA    |
| 42 | <i>FZD9</i>         | F  | TGCGAGAACCCCGAGAAGT      |
|    |                     | R  | GGGACCAGAACACCTCGAC      |
| 43 | <i>FZD10</i>        | F  | GCTCATGGTGCGTATCGGG      |
|    |                     | R  | GAGGCGTTCGTAAAAGTAGCA    |
| 44 | <i>LRP6</i>         | F  | ACGATTGTAGTTGGAGGCTTG    |
|    |                     | R  | ATGGCTTCTTCGCTGACATCA    |
| 45 | <i>ROR2</i>         | F  | ATGGTTCACGACTGCGAATCC    |
|    |                     | R  | AATGGTCTTCATCCCGTTGGT    |
| 46 | <i>RYK</i>          | F  | CCCAGGTCAACATTTCTGTTCA   |
|    |                     | R  | TGCCAGTACAGGAAAGCTCTAC   |
| 47 | <i>pri-miR-125b</i> | R1 | CTGAGAGGAGCGCAACAATGT    |
|    |                     | F2 | GAAGAATTCTACCGCATCAAACCA |
|    |                     | R2 | CTGCAGACAATCAATAAGGTCCAA |
| 48 | <i>SOX2</i>         | F  | CCCTGCTGAGAATAGGACAT     |
|    |                     | R  | CCCTGCAGTACAACCTCTATG    |
| 49 | <i>TCF4</i>         | F  | TCCCACCACATCATACGCTACAC  |
|    |                     | R  | TCGCTTGCTTCTCTGGACAG     |



| <b>Cloning primers</b>         |                                  |              |                                                       |
|--------------------------------|----------------------------------|--------------|-------------------------------------------------------|
| 1                              | <i>FZD6</i> (ORF)                | EcoRI, F     | GTTGTTGAATTCGCCACCATGGAGATGTTTACATTTTTGTTGAC<br>GTGTA |
|                                |                                  | NotI, R      | GTTGTTGCGGCCGCTCAAGTATCTGAATGACAACCACCTCCC            |
| 2                              | <i>MIR-20b</i><br>promoter       | F            | GTTTTCGCTTTGGCGGGGTGGG                                |
|                                |                                  | R            | GCCCCAACGAAGGGCTCCCTTCTTGCC                           |
| 3                              | <i>NLK</i>                       | EcoR1        | GTTGTTGAATTCGCCACCATGGCGGCTTACAATGGCGGTACAT<br>C      |
|                                |                                  | BamH1        | GTTGTTGGATCCTCACTCCCACACCAGAGGAGATGGG                 |
| 4                              | <i>TAK1</i>                      | EcoR1        | GTTGTTGAATTCGCCACCATGTCTACAGCCTCTGCCGCC               |
|                                |                                  | BamH1        | GTTGTTGGATCCTCATGAAGTGCCTTGTCGTTTCTGC                 |
| 5                              | <i>FZD1</i> (ORF)                | Xho I, F     | GATCTCGAGATGGCTGAGGAGGAGGCGCCTAAGAAGTC                |
|                                |                                  | BamH I,<br>R | ACGGGATCCTCAGACTGTAGTCTCCCCTTGTTTG                    |
| 6                              | <i>FZD3</i> (ORF)                | EcoR1,F      | GTTGTTGAATTCGCCACCATGGCTATGACTTGGATTGTCTTCTC<br>TC    |
|                                |                                  | EcoR1,R      | GTTGTTGAATTCGCCACCTTAAGCACTGGTTCCATCTTCTTC            |
| 7                              | <i>FZD5</i> (ORF)                | EcoR1,F      | AAAAGAATTCATGGCTCGGCCTGACCCATCCGCG                    |
|                                |                                  | BamH<br>I,R  | ACGGGATCCCTACACGTGCGACAGGGACACCTGCT                   |
| <b>CHIP-sequencing primers</b> |                                  |              |                                                       |
| 1                              | <i>mIR-20b</i><br>promoter       | F            | GACAGCGCTCTGTAGAATAAAATG                              |
|                                |                                  | R            | GTATATAGCCCGTTGTCTCTCAT                               |
| 2                              | <i>mIR-125b</i><br>promoter,1-3  | F            | AGAAGAACAAGAAGAAGAAAG                                 |
|                                |                                  | R            | TCTCGAGACTGTA ACTCTGTAGCTT                            |
| 3                              | <i>mIR-125b</i><br>promoter, 4-5 | F            | TCAATGGGTGAGTTCAGAACGC                                |
|                                |                                  | R            | CGCATATACAATCACGCACATACAC                             |
|                                | <i>mIR-MYC</i><br>promoter       | F            | GCACGGAAGTAATACTCCTCTCCTC                             |
|                                |                                  | R            | CAGAAGAGACAAATCCCCTTTGCGC                             |

### Supplementary Reference

1. Mao P, et al. Mesenchymal glioma stem cells are maintained by activated glycolytic metabolism involving aldehyde dehydrogenase 1A3. *Proc Natl Acad Sci U S A* **110**, 8644-8649 (2013).
